1 **ATP-Citrate lyase fuels axonal transport across species**

2 Aviel Even<sup>1,\*</sup>, Giovanni Morelli<sup>2,3,\*</sup>, Romain Le Bail<sup>2</sup>, Michal Shilian<sup>1</sup>, Silvia Turchetto<sup>2</sup>, Loïc Broix<sup>2</sup>,  
3 Alexander Brandis<sup>4</sup>, Shani Inbar<sup>1</sup>, Alain Chariot<sup>5</sup>, Frédéric Saudou<sup>6,7,8</sup>, Paula Dietrich<sup>9</sup>, Ioannis  
4 Dragatsis<sup>9</sup>, Bert Brone<sup>3</sup>, Jean-Michel Rigo<sup>3</sup>, Miguel Weil<sup>1,\*†</sup> and Laurent Nguyen<sup>2,\*†</sup>

5

6 <sup>1</sup>Laboratory for Neurodegenerative Diseases and Personalized Medicine, School of Molecular Cell Biology and  
7 Biotechnology, The George S. Wise Faculty for Life Sciences, Sagol School of Neurosciences, Tel Aviv  
8 University, Ramat Aviv 69978, Israel.

9 <sup>2</sup>Laboratory of Molecular Regulation of Neurogenesis, GIGA-Stem Cells, Interdisciplinary Cluster for Applied  
10 Genoproteomics (GIGA-R), University of Liège, C.H.U. Sart Tilman, Liège 4000, Belgium.

11 <sup>3</sup>BIOMED Research Institute, Hasselt 3500, Belgium.

12 <sup>4</sup>Life Sciences Core Facilities, Weizmann Institute of Science, Israel

13 <sup>5</sup>Laboratory of Medical Chemistry, GIGA-Stem Cells, Interdisciplinary Cluster for Applied Genoproteomics  
14 (GIGA-R), University of Liège, C.H.U. Sart Tilman, Liège 4000, Belgium.

15 <sup>6</sup>Univ. Grenoble Alpes, Inserm, U1216, CHU Grenoble Alpes, Grenoble Institut Neurosciences, 38000 Grenoble,  
16 France.

17 <sup>7</sup>Inserm, U1216, F-38000 Grenoble, France.

18 <sup>8</sup>CHU Grenoble Alpes, F-38000 Grenoble, France

19 <sup>9</sup>Department of Physiology, University of Tennessee Health Science Center, Memphis, TN 38163, USA.

20

21

22

23 *Running title: Elongator modulates ATAT1 activity via ATP-Citrate Lyase*

24 *\*Equal contribution to the work*

25 *†Corresponding authors:*

26 *Laurent Nguyen, lnguyen@uliege.be*

27 *Miguel Weil, miguelw@tauex.tau.ac.il*

28

1 **Abstract**

2 Microtubule (MT)-based transport is an evolutionary conserved processed finely tuned by  
3 posttranslational modifications. Among them,  $\alpha$ -tubulin acetylation, which is catalyzed by the  
4  $\alpha$ -tubulin N-acetyltransferase 1, Atat1, promotes the recruitment and processivity of molecular  
5 motors along MT tracks. However, the mechanisms that controls Atat1 activity remains poorly  
6 understood. Here, we show that a pool of vesicular ATP-citrate lyase Acly acts as a rate limiting  
7 enzyme to modulate Atat1 activity by controlling availability of Acetyl-Coenzyme-A (Acetyl-  
8 CoA). In addition, we showed that Acly expression is reduced upon loss of Elongator activity,  
9 further connecting Elongator to Atat1 in the pathway regulating  $\alpha$ -tubulin acetylation and MT-  
10 dependent transport in projection neurons, across species. Remarkably, comparable defects  
11 occur in fibroblasts from Familial Dysautonomia (FD) patients bearing an autosomal recessive  
12 mutation in the gene coding for the Elongator subunit ELP1. Our data may thus shine new light  
13 on the pathophysiological mechanisms underlying FD.

14

15

16

17

18

19

20

21

22

23

24

25

## 1 **Introduction**

2 Axonal transport is an evolutionary conserved process that delivers cargoes to distant  
3 subcellular compartments. It is supported by molecular motors (kinesins and dyneins) that run  
4 along microtubule (MT) tracks and is particularly important for projection neurons that send  
5 axons to distant targets. MT-dependent transport contributes to neuronal development in  
6 growing dendrites and axons via slow axonal transport of cytoskeletal elements and, later, it  
7 sustains survival and homeostasis of neurons via fast axonal transport of organelles  
8 (mitochondria, lysosomes,..) and vesicles carrying various types of proteins (growth factors,  
9 synaptic proteins,..). Axonal transport defect is a hallmark of several neurodegenerative  
10 disorders, whose disruption affects neuronal function and survival (1-4). This is exemplified  
11 by loss of activity of the Elongator complex, which is associated with both neurodegeneration  
12 and axonal transport defects (5, 6). This molecular complex, conserved from yeast to human,  
13 is composed of two copies of six distinct protein subunits (Elp1 to Elp6) (7). Elp3 is the  
14 enzymatic core of Elongator and harbors two highly conserved subdomains, a tRNA  
15 acetyltransferase (8) and a S-adenosyl methionine binding domains (9). Elp1 is the scaffolding  
16 subunit of the complex but disruption of any of the Elongator subunits leads to comparable  
17 phenotype in eukaryotes, suggesting that all subunits are essential for the integrity and activity  
18 of the complex (10, 11). Elongator serves molecular functions in distinct subcellular  
19 compartments (12) but predominantly accumulates in the cytoplasm where it promotes the  
20 formation of 5-methoxycarbonylmethyl ( $mcm^5$ ) and 5-carbamoylmethyl ( $nem^5$ ) on side-chains  
21 of the wobble uridines ( $U_{34}$ ) of selected tRNAs, thereby regulating protein translation (8, 13).  
22 Convergent observations support a role for Elongator in intracellular transport in the nervous  
23 system as Elp3 is enriched at the pre-synaptic side of neuromuscular junction buttons in flies,  
24 where its expression is required for synapse integrity and activity (14, 15). Elongator subunits  
25 are also detected in protein extracts from purified motile vesicles isolated from the mouse

1 cerebral cortex (16), and they colocalize with the vesicular markers SV2 and RAB3A in human  
2 embryonic stem cells derived neurons (17). In humans, mutation of the gene coding for ELP1,  
3 underlies Familial dysautonomia (FD), a devastating disease that mostly affects the  
4 development and survival of neurons from the autonomic nervous systems (18, 19). Moreover,  
5 other neurological disorders are also associated with mutations affecting the expression or the  
6 activity of Elongator (5, 20-23). Experimental data on animal models show that interfering with  
7 Elongator activity promotes early developmental and progressive neurodegenerative defects,  
8 including poor axonal transport and maintenance (24-27). At the molecular level, loss of  
9 Elongator indeed correlates with poor acetylation of the  $\alpha$ -tubulin lysine 40 (K40) in neuronal  
10 microtubules (MT) (6, 25, 28). This post-translational modification (PTM) modulates axonal  
11 transport by facilitating the recruitment of molecular motors to MTs (29) and the loading of  
12 motile vesicles on motors (6). The acetylation of MTs relies mostly on a vesicular pool of  
13 tubulin acetyltransferase 1 (Atat1) (30) that catalyzes the transfer of acetyl groups from Acetyl-  
14 Coenzyme-A (Acetyl-CoA) onto lysine 40 (K40) of  $\alpha$ -tubulin (31, 32). How loss of Elongator  
15 affects MT acetylation, and whether a functional correlation between Elongator and Atat1  
16 exists, remains to be explored.

17 Here, by combining cellular and molecular analyses in mouse cortical neurons *in vitro* and fly  
18 larva motoneurons *in vivo*, we show that loss of Elongator impairs axonal transport and  
19 acetylation of  $\alpha$ -tubulin across species. Moreover, our findings support a common pathway  
20 where Elongator modulates Atat1 activity by regulating the expression of the ATP-citrate lyase  
21 (AclY), which produces acetyl-coA and thus provides acetyl groups for Atat1 activity towards  
22 MTs. Importantly, analysis of primary fibroblasts from FD patients show molecular defects  
23 comparable to those observed in mice and fly projection neurons depleted in Elongator.  
24 Therefore, our data may shine new light on the pathophysiological mechanisms underlying FD  
25 and other neurological disorders resulting from impaired Elongator activity.

## 1 **Results**

### 2 ***Elongator and Atat1 cooperate in a common pathway to regulate the acetylation of $\alpha$ -tubulin*** 3 ***and axonal transport***

4 In order to understand how Elongator controls tubulin acetylation and MT-based transport, we  
5 first performed complementary experiments in distinct animal models that lack Elongator  
6 activity. We compared the level of  $\alpha$ -tubulin acetylation in cultured cortical projection neurons  
7 (PN) that were isolated from embryonic (E) day 14.5 WT or *Elp3*cKO mouse embryos  
8 (conditional loss of *Elp3* in cortical progenitors upon breeding *Elp3*<sup>lox/lox</sup> (33) and FoxG1:Cre  
9 (34) transgenic mice). The axon of *Elp3* cKO PNs displayed 50% reduction of acetylation of  
10  $\alpha$ -tubulin (Figure 1a). We next assessed axonal transport in PNs that were cultured in  
11 microfluidic devices for five days and incubated with specific dyes to track lysosomes  
12 (LysoTracker®) and mitochondria (MitoTracker®) movements by time-lapse  
13 videomicroscopy (Figure 1b). *Elp3* cKO PNs showed a significant reduction of average and  
14 moving velocities of lysosomes and mitochondria along axons, which correlated with an  
15 increase of their pausing times, as compared to WT PNs. Moreover, the moving velocities of  
16 lysosomes and mitochondria were reduced in both anterograde and retrograde directions  
17 (Figure S1a- S1g). These results confirmed that loss of Elongator activity leads to defects of  $\alpha$ -  
18 tubulin acetylation and molecular transport in cortical neurons. Since a vesicular pool of *Atat1*  
19 promotes the acetylation of  $\alpha$ -tubulin, thereby axonal transport in cortical PNs (30), we  
20 postulated that *Atat1* and Elongator might contribute to axonal transport via a shared molecular  
21 pathway. To test this hypothesis, we infected cortical PNs from E14.5 WT and *Atat1* KO mice  
22 with lentiviruses expressing either sh-*Elp3* or sh-control (Figure S1h-i), and we cultured them  
23 in microfluidics devices for five days (Figure 1b). Targeting *Elp3* in WT neurons impaired  
24 lysosomes and mitochondria transport across PN axons. However, we did not observe any  
25 additive effect on MT acetylation or axonal transport kinetics upon reduction of *Elp3*

1 expression in *Atat1* KO PNs (which show reduced acetylation of  $\alpha$ -tubulin; Figure S1j) (Figure  
2 1c-e, Figure S1k-n). Comparable observations were made *in vivo* in motoneurons (MNs) from  
3 3<sup>rd</sup> instar larvae of *Drosophila melanogaster* obtained by crossing UAS:*Elp1* or UAS:*Elp3*  
4 RNAi fly lines with D42:Gal4 line specific for MNs (further called *Elp1* KD and *Elp3* KD).  
5 The knockdown efficiency of the UAS:*Elp1* and UAS:*Elp3* in postmitotic neurons was  
6 validated in adult fly heads (Elav:Gal4 driver; Figures S1o-p). We first confirmed that the level  
7 of  $\alpha$ -tubulin acetylation was reduced in *Elp1* and *Elp3* KD 3<sup>rd</sup> instar larvae MNs, a defect  
8 genetically rescued by expressing human (h) ELP3 or by co-targeting the main  $\alpha$ -tubulin  
9 deacetylase HDAC6 with RNAi (*Elp1;Hdac6* KD, *Elp3;Hdac6* KD) (Figure 1f). Moreover,  
10 knocking down both *Elp3* and *Atat1* (*Elp3;Atat1* KD) did not further reduce the acetylation  
11 levels of  $\alpha$ -tubulin as compared to *Elp3* KD alone (Figure 1f; p=0.259 and p=0.775,  
12 respectively). *In vivo* time-lapse recordings of axonal transport of synaptotagmin-GFP (SYT1-  
13 GFP) in MNs from anesthetized fly 3<sup>rd</sup> instar larvae (Figure 1g) correlated with levels of  $\alpha$ -  
14 tubulin acetylation (Figure 1f). We observed a reduction of both average and moving velocities  
15 of SYT1-GFP vesicles together with an extension of their pausing time, both in *Elp1* KD or  
16 *Elp3* KD larvae, and with no cumulative defects in *Elp3;Atat1* KD flies (Figures 1h-j, Figure  
17 S1q). Moreover, targeting *Hdac6* fully rescued the observed axonal transport defects observed  
18 in *Elp1/3* KD in 3<sup>rd</sup> instar larvae MNs (*Elp1;Hdac6* KD, *Elp3;Hdac6* KD) (Figures 1h-i, Figure  
19 S1q).  
20 Interfering with Elongator activity affects codon-biased translation that can ultimately lead to  
21 protein aggregation (35), thereby blocking axonal transport (36). However, we did not detect  
22 significant protein aggregation in the axon of either cultured cortical neurons from *Elp3* cKO  
23 mice (Figure S1r) or motoneurons from *Elp1* or *Elp3* KD 3<sup>rd</sup> instar larvae *in vivo* (Figure S1s),  
24 while axonal aggregates formed upon blocking the proteasome activity with MG132

1 incubation. Altogether, our results suggest that the transport defects observed in the axon of  
2 Elongator deficient neurons unlikely result from a local accumulation of protein aggregates.  
3 Since impaired axonal transport in fly MNs leads to locomotion defects (1, 37), we measured  
4 larvae crawling speed and adult flies climbing index as functional readouts of axonal transport  
5 activity in MNs (30, 37). These parameters were affected upon depletion of either *Elp1* or *Elp3*  
6 (Figures 1k-l), and are likely the result of axonal transport defects, as we did not observe  
7 morphological changes at the synapses of the neuromuscular junctions (Figure S1u).  
8 Elongator shares high amino acid similarity across species (Figure S1t). Expression of human  
9 *ELP3* in MNs of 3<sup>rd</sup> instar larvae of *Elp3* KD flies (*Elp3* KD+*ELP3*) rescued  $\alpha$ -tubulin  
10 acetylation (Figure 1f), axonal transport parameters (Figure 1h-j, Figure S1q) and locomotor  
11 behavior defects (Figures 1k-l), indicating that ELP3, and by extension Elongator, has a  
12 conserved evolutionary role from human to fly in axonal transport. Moreover, we show that  
13 loss of Elongator activity does not worsen the axonal phenotype of *Atat1* KO neurons, further  
14 suggesting that these molecules may cooperate in a common molecular pathway to modulate  
15 MT acetylation and axonal transport (31, 32).

16

17 ***Loss of Elongator impairs the production of acetyl-CoA, thereby interfering with Atat1-***  
18 ***mediated MT acetylation***

19 Since *Hdac6* knockdown rescued the axonal transport observed in Elongator deficient neurons  
20 (Figure 1f-1k), we tested whether these defects may arise from a change of expression or  
21 activity of *Hdac6* and/or *Atat1*, the enzymes that control  $\alpha$ -tubulin de/acetylation, respectively  
22 (38, 39). Since no change in *Atat1* and *Hdac6* expression in cortical extracts from *Elp3* cKO  
23 and WT littermate newborn mice (Figures 2a-c) were observed, the activity of *Atat1* was  
24 measured by using an *in vitro*  $\alpha$ -tubulin acetylation assay (30). For this assay, pre-polymerized  
25 unacetylated MTs from HeLa cells were incubated with acetyl-CoA and P0 mouse brain

1 extracts from *Elp3* cKO or WT littermate controls (Figures S2c-S2d) to assess the level of  
2 acetylation of  $\alpha$ -tubulin. In strike contrast to brain extracts from *Atat1* KO mouse pups, we did  
3 not observe any differences in MT acetylation levels between cortical extracts from *Elp3* cKO  
4 and WT mice (Figure 2d). Moreover, the deacetylation activity of Hdac6 towards MTs,  
5 assessed *in vitro* by incubating free acetylated  $\alpha$ -tubulin from bovine brains with cortical  
6 extracts from newborn *Elp3* cKO or WT littermate controls (38), was comparable between  
7 conditions (Figure 2e). Altogether, these results suggest that loss of Elongator activity does not  
8 impair the acetylation of  $\alpha$ -tubulin by changing the expression or activity of Hdac6 or *Atat1*.  
9 Since the vesicular pool of *Atat1* is predominant (30), we performed sub-fractionation of  
10 cortical lysates from adult mice lacking *Elp1* (27), the scaffolding protein of the Elongator  
11 complex (*Elp1* cKO mice, Figure S2b) and analyzed their “vesiculome” using LC-MS/MS  
12 (Figure 2f). While *Atat1* expression remained unchanged, the level of the ATP-citrate lyase  
13 (*Acly*), which converts glucose-derived citrate into acetyl-CoA (40) was significantly reduced  
14 upon loss of *Elp1* expression (Figures 2g-2h). *Acly* generates acetyl-CoA and provides acetyl  
15 groups to *Atat1* for acetylation of  $\alpha$ -tubulin K40 in MTs (32). We thus hypothesized that the  
16 acetylation of  $\alpha$ -tubulin could be regulated by homeostatic changes in *Acly*-dependent acetyl-  
17 CoA concentration, as previously observed for histone acetylation (41). Specifically, we  
18 postulated that loss of Elongator could interfere with MT acetylation and axonal transport via  
19 reduction of *Acly* expression. To test this hypothesis, we performed an *in-vitro* acetyl-CoA  
20 production assay (malate dehydrogenase coupled assay) (41), where subcellular fractions (T;  
21 total, S2: cytosolic + vesicular, S3: cytosolic, P3: vesicular; see figure 2f) of cortical brain  
22 extracts from *Elp3* cKO and WT littermate newborns was mixed with *Acly* substrates (ATP,  
23 CoA and citrate) (Figure 2i). The vesicular fraction (P3), which is strongly enriched into  
24 Elongator subunits (*Elp1* and *Elp3*) *Atat1* and *Acly* (Figures 2K, S2a), more efficiently  
25 produced acetyl-coA (Figures 2i-j). While cortical extracts from *Elp3* cKO E14.5 mouse



1 embryos (Figures S2c-S2d) showed no change of *Acly* transcription (Figure 2l), we observed a  
2 reduction of *Acly* expression together with a correlative decrease of MTs acetylation (Figure  
3 S2d). Indeed, the analysis of the *Elp3* cKO and WT newborn littermates show a robust decrease  
4 of *Acly* protein level in both the cytosolic (*S3*, Figure 2m) and the vesicular fractions (*P3*,  
5 Figure 2n). Moreover, we detected a reduction of acetyl-CoA level in cortical extracts from  
6 *Elp3* cKO mice, as compared with WT newborn littermates by using LC-MS metabolic  
7 analysis (Figure 2o). Altogether, these results support an existing cooperation between  
8 Elongator and Atat1 in MT-acetylation via the regulated expression of the rate-limiting enzyme  
9 *Acly*, which provides acetyl-group donors to Atat1 for catalyzing  $\alpha$ -tubulin acetylation in  
10 neurons.

11

12 ***Expression of *Acly* rescues both the level of acetylation of  $\alpha$ -tubulin and the axonal transport***  
13 ***defects in flies and mice that lack *Elongator* activity***

14 In order to test whether *Acly* is required for proper axonal transport in fly, we generated *Acly*  
15 KD flies (42) that displayed reduced  $\alpha$ -tubulin acetylation (Figure 3a) together with impairment  
16 of axonal transport of synaptotagmin (SYT1-GFP) vesicles (Figures 3b-d, Figure S3a). In  
17 agreement with our observation made with *Elp3* cKO mice (Figures 2m, 2n), the expression of  
18 *Acly* protein was also reduced in the brain of adult *Elp3* RNAi flies (*Elav:GAL4; Elp3RNAi*)  
19 (Figure 3e). We postulated that the acetylation of  $\alpha$ -tubulin and the axonal transport defects  
20 observed upon loss of *Elongator* may arise from a reduced expression of *Acly*. To test this  
21 hypothesis, we expressed human ACLY (which shares high amino acid homology with its  
22 murine and fly homologues; Figure S3b) in *Elp3* KD larva MNs (*UAS:Elp3 RNAi* and  
23 *UAS:ACLY, Elp3 KD+ACLY*) and in *Elp3* cKO mouse cortical PNs and showed that it raised  
24 the acetylation of  $\alpha$ -tubulin in both flies MNs *in vivo* (Figure 3f) and in culture mouse cortical  
25 PNs *in vitro* (Figure 3l). Those data were correlated with a rescue of all axonal transport

1 parameters, including the average and moving bi-directional transport velocities together with  
2 pausing time of SYT1-GFP vesicle in MNs of 3<sup>rd</sup> instar larvae (Figures 3g-i, Figure S3c) as  
3 well as of lysosomes and mitochondria in cultured PNs from *Elp3* cKO mice (Figures 3m-o,  
4 Figure S3d-g). Furthermore, the locomotion activities of both *Elp3* KD 3<sup>rd</sup> instar larvae and  
5 adult flies were restored to control levels upon ACLY expression (Figure 3j-k). Altogether,  
6 these results suggest that the reduction of Acly expression leads to MTs acetylation and axonal  
7 transport defects in Elongator deficient neurons.

8

9 ***Fibroblasts from Familial Dysautonomia patients show defects of tubulin acetylation and***  
10 ***MT-dependent transport***

11 In order to place our findings in a human pathological context, we analyzed primary skin  
12 fibroblasts from FD patients. These cells were isolated from FD patients carrying the splice  
13 site IVS20+6T\_C variant in *ELP1* (43) that expressed barely detectable amount of ELP1  
14 proteins and low level of ELP3 that results from its instability upon non-assembly of the  
15 Elongator complex (Figure S4a) (25). We observed a reduction of acetylation of  $\alpha$ -tubulin and  
16 MT-dependent transport defects in FD fibroblasts (Figure S4b-f), which were comparable to  
17 those observed in fly and mouse neurons. This modification was not resulting from an  
18 increased deacetylation activity of HDAC6 towards MTs in extracts fibroblasts nor a massive  
19 intra-cellular protein aggregation that would affect MT-dependent transport in FD fibroblasts  
20 (Figures S4g-s4h). Both  $\alpha$ -tubulin acetylation and MT-dependent transport parameters were  
21 corrected in FD fibroblasts by blocking tubulin deacetylation with incubation of the HDAC6  
22 specific inhibitor, Tubastatin (TBA; 10uM during 30 min) (Figure S4b). Similarly to the animal  
23 models, FD fibroblasts express reduced amount of ACLY proteins (Figures 4a) and incubation  
24 with the ACLY competitive inhibitor Hydroxycitrate (HCA) for 8 hours interfered in a dose-  
25 dependent manner with MT acetylation (Figure 4b), in both WT and FD fibroblasts and in line

1 with the residual expression of ACLY observed in FD fibroblasts (Figure 4a). We next showed  
2 that overexpression of ACLY in FD fibroblasts rescued the level of acetylation of  $\alpha$ -tubulin  
3 (Figure 4c) as well as the defects of MT-dependent transport of lysosomes (Figures 4d-4f, S4i).  
4 Altogether, these results demonstrate that a reduction of ACLY in FD fibroblasts underlies MT  
5 acetylation and MT-dependent transport impairments; these molecular defects likely contribute  
6 to the pathological mechanisms underlying FD.

7

## 8 **Discussion**

9 Here we show that loss of Elongator activity impairs both MT acetylation and bidirectional  
10 axonal transport in mouse cortical neurons in culture as well as in fly motoneurons *in vivo*,  
11 ultimately resulting in locomotion deficits in flies. These defects are similar to those observed  
12 upon loss of *Atat1* expression, the enzyme that catalyzes the acetylation of  $\alpha$ -tubulin K40  
13 residues in MTs. This shared phenotype prompted us to investigate a possible collaboration  
14 between Elongator and *Atat1* in the control of MT-dependent axonal transport via  $\alpha$ -tubulin  
15 acetylation. By combining conditional loss of function models with genetic complementation  
16 experiments, we observed a molecular cooperation between these molecules and identified  
17 *Acly* as the common denominator, which provides acetyl groups from Acetyl-CoA to vesicular  
18 *Atat1* and whose expression depends on Elongator activity. We showed that raising *Acly* level  
19 not only rescued axonal transport defects in both mouse and fly Elongator models but also  
20 improved locomotion activity of *Elp3* KD larvae and flies. Moreover, loss of Elongator activity  
21 does not affect *Acly* transcription but prevents the accumulation of its proteins in neurons. Since  
22 the expression of ACLY rescues defects of  $\alpha$ -tubulin acetylation and axonal transport in both  
23 mouse and fly Elongator models, it is unlikely the reduced amount of *Acly* proteins detected  
24 by western blotting mainly results from the poor translation of its corresponding transcripts.  
25 However, Elongator may promote *Acly* protein stabilization via a direct interaction, as

1 previously reported for other cytoplasmic proteins. Another non-mutually exclusive  
2 mechanism that may act downstream Elongator would involve the regulation of the  
3 acetyltransferase (44) P300/CBP-associated factor (PCAF), which is known to increase Acly  
4 stability by promoting its acetylation (44). Indeed, the molecular mechanism linking Elongator  
5 to Acly expression deserves more attention and is currently under investigation in the  
6 laboratory.

7 Elongator subunits and Atat1 have been detected in protein extracts from purified motile  
8 vesicles (16, 30) and the present study confirms those data and shows that a functional pool of  
9 Acly is also predominantly enriched in the vesicular fraction of mouse cerebral cortical  
10 extracts. Therefore, we postulate that an Elongator/Acly/Atat1 (EAA) signaling pathway may  
11 directly act at vesicles to promote MT acetylation, further supporting their non-canonical role  
12 as a platform for local signaling and for regulating axonal transport in particular (Figure 4g).  
13 Since these molecules are also detected in the cytosol (but only a small pool for Atat1 and  
14 Acly; Figure 2k), we cannot rule out a minor contribution of a cytosolic EAA pathway to these  
15 processes. We observed comparable defects of  $\alpha$ -tubulin acetylation and MT-dependent  
16 transport in fly, mouse, and human cells lacking Elongator activity, which, together with  
17 similar observations made in *C. elegans* (6), suggest a strong functional conservation of the  
18 EAA pathway across species.

19 A tight control of axonal transport is indeed very important to ensure homeostatic activity to  
20 neurons by delivering cargos to distant regions, thereby controlling cytoskeleton maintenance  
21 as well as spreading long range intracellular signaling that ensures cellular maintenance and  
22 function. Impairment of axonal transport is indeed considered as an early pathological feature  
23 shared by several neurodegenerative disorders (2, 45, 46). Along this line, our results obtained  
24 with FD fibroblasts support those previously described in neurons (28) and suggest that loss of  
25 Elongator activity contribute to neurodegeneration by interfering with MT-dependent transport

1 in FD patients via impairment of ACLY expression. We did not observe differences in MT  
2 deacetylation activity in FD and WT fibroblasts (Figures S4g), suggesting that reduction of  
3 MT-acetylation in FD fibroblasts does not arise from changes of HDAC6 expression, in  
4 contrast to what others have reported (28).

5 More generally,  $\alpha$ -tubulin acetylation not only modulates axonal transport but also provides  
6 resistance to mechanical bending to MTs (47). Therefore, by controlling the cytoskeleton  
7 integrity and function, the EAA pathway likely acts as a key regulator of neuronal fitness whose  
8 progressive dysfunction may contribute to neuronal aging and even underlies  
9 neurodegeneration. Thus, targeting this molecular pathway may open new therapeutic  
10 perspectives to prevent the onset or the progression of neurodegenerative disorders  
11 characterized by poor axonal transport and degeneration.

12

### 13 **Figure legends**

14

#### 15 ***Figure 1. Reduction of Elongator activity leads to axonal transport defects in mouse and fly.***

16 **(a)** Immunolabelings and quantification of acetylated  $\alpha$ -tubulin (Ac  $\alpha$ -Tub) and total tubulin  
17 (Tot Tub) in axon of E14.5 WT and *Elp3 cKO* mice cortical neurons cultured for 5 DIV in  
18 microfluidic devices. Scale bar is 10  $\mu$ m **(b)** Experimental set up to record axonal transport by  
19 time-lapse microscopy in E14.5 mice cortical neurons cultured for 5 DIV in microfluidic  
20 devices. **(c-e)** Histograms showing axonal transport of lysosomes (LysoTracker®) in WT or  
21 *ATAT1 KO* cultured neurons infected with sh-Control or sh-*Elp3* to analyze average (av.)  
22 velocity **(c)**, moving velocity **(d)** and percentage of pausing time **(e)**. **(f-l)** Study of *Drosophila*  
23 *melanogaster* expressing RNAi under a motoneuron-specific driver (D42:GAL4); control,  
24 *Elp1* KD, *Elp3* KD, *ATAT1*; *Elp3* KD, *Elp3* KD + human *Elp3*, *Elp1;Hdac6* KD and  
25 *Elp3;Hdac6* KD. **(f)** Immunolabelings and quantification of acetylated  $\alpha$ -tubulin (Ac  $\alpha$ -Tub)

1 and total tubulin (Tot Tub) in motoneuron axon of 3<sup>rd</sup> instar larvae, genotype as indicated. Scale  
2 bar is 10  $\mu$ m. (g) Experimental set up for *in vivo* time-lapse recording of Synaptotagmin-GFP  
3 (Syt1-GFP) axonal transport in 3<sup>rd</sup> instar larvae motoneurons, to analyze average (av.) velocity  
4 (h), moving velocity (i) and percentage of pausing time (j). (k-l) Locomotion assays:  
5 histograms of the climbing index of adult flies (k) and the crawling speed of 3<sup>rd</sup> instar larvae  
6 (l). Description of graphical summaries here within are histograms of means  $\pm$  SEM, while  
7 statistical analyses of: (a) is two-tailed t-test, (c, d, e, f, h, i, j, l) are Kruskal-Wallis test, and  
8 (k) is one-way analysis of variance (ANOVA). Specifically, [(a) p=0.0070, t=2.812, df=5; (c)  
9 p<0.0001 and K=80.47; (d) p<0.0001, K=34.30 and p<0.0001, K=23.46 for anterograde and  
10 retrograde, respectively, (e) p<0.0001 and K=73.34, (f) p<0.0001 and K=88.16, (h) p<0.0001  
11 and K=223.6, (i) p<0.0001, K=110.3 and p<0.0001, K=45.69 for anterograde and retrograde,  
12 respectively, (j)p<0.0001, K=46.06, (k) p<0.0001, F=28.74; (l) p<0.0001, K=86.04. In  
13 addition, post hoc multiple comparisons for (c, d, e, f, h, i, j, l) Dunn's test, for (k) Dunnett's  
14 test and are \*\*p < 0.01, \*\*\*p < 0.001, and \*\*\*\*p < 0.0001. The total number of samples  
15 analyzed were as follows: (a) 25-28 neurons from 3 different mice per group; (c-e) 58 to 180  
16 vesicles coming from 3 different mice per group (at least 5 images per animal); (f) 14 to 32  
17 motoneurons from at least 5 larvae per group; (h-j) 81-264 vesicles tracks from 7-12 larvae per  
18 group; (k) 6 to 15 test per group containing 10 adult flies; (l) 12 to 21 larvae per group.

19

20 **Figure 2. *Elongator* deletion impairs tubulin acetylation and axonal transport via reduction**  
21 **of *Acy*-dependent acetyl-coA production.**

22 (a-c) Immunoblotting to detect Atat1, Hdac6, Elp3 and  $\beta$ -Actin cortical extracts from newborn  
23 WT and *Elp3 cKO* mice and histograms of proportion of Atat1(b) and Hdac6 (c) expression to  
24  $\beta$ -Actin. (d) In vitro acetylation assay of non-acetylated MTs from HeLa cells incubated for 2  
25 hours with extracts of brain cortices isolated from WT, *Elp3 cKO* or *Atat1 KO* mice. (e) In

1 vitro deacetylation assay of endogenously acetylated bovine brain tubulin incubated for 4 hours  
2 with extracts of cortices isolated from WT, *Elp3 cKO* or without tissue extract (control). **(f)**  
3 Experimental pipeline for subcellular fractionation of mouse cortical extracts: T, total; S1,  
4 postnuclear; P1, nuclear; S2, cytosol and vesicles; P2, large membranes; S3, cytosol; and P3,  
5 vesicles. **(g-h)** Histogram of relative *Atat1* and *Acly* label free quantification (LFQ) intensities  
6 analyzed by LC-MS/MS of P3 fraction from WT and *Elp1 cKO* mice. **(i-j)** Analysis of *Acly*  
7 activity by malate dehydrogenase coupled method performed in WT and *Elp3 cKO* brain cortex  
8 lysates. **(i)** Histogram of relative *Acly* activity over assay (i) and of slopes (j) from the linear  
9 phase of the reaction. **(k)** Subcellular fractionation (T, S1, P1, S2, P2, S3, P3) of mouse brain  
10 cortex immunoblotted with specific antibodies for *Acly*, *Elp1*, *Elp3*, *Atat1*, *Hdac6*,  
11 synaptophysin (*Syp*),  $\alpha$ -tubulin ( $\alpha$ -*Tub*), and Histone H3 (*HH3*). **(l)** qRT-PCR analysis of *Acly*  
12 mRNA in cortical brain extracts of *Elp3 cKO* or WT littermate mice. **(m-n)** Immunoblotting  
13 and quantification of cytosolic (**m**) and vesicular (**n**) fractions of *Acly* protein from newborn  
14 WT and *Elp3 cKO* mice brain cortices. **(o)** LC-MS quantification of Acetyl-CoA levels in WT  
15 and *Elp3 cKO* P0 mice brain cortex lysates. Description of graphical summaries here within  
16 are histograms of means  $\pm$  SEM, while statistical analyses of **(b, c, m, n)** are two-tailed t-test,  
17 **(g, h, l, o)** are Mann-Whitney test, **(d, e, j)** are one-way analysis of variance (ANOVA), **(i)** is  
18 RM two-way ANOVA. Specifically, [**(b)**  $p=0.7505$ ,  $t=0.3248$ ,  $df=13$ ; **(c)**  $p=0.8411$ ,  $t=0.2093$ ,  
19  $df=6$ ; **(d)**  $p<0.0001$ ,  $F=85.29$ ; **(e)**  $p<0.0001$ ,  $F=21.30$ , **(g)**  $p=0.7619$ ,  $U=10$ , **(h)**  $p=0.0087$ ,  $U=2$ ,  
20 **(i)**  $p<0.0001$ ,  $F_{Interaction}(294, 882) = 68.07$ ; **(j)**  $p<0.0001$ ,  $F=1352$ ; **(l)**  $p=0.5714$ ,  $U=5$ ; **(m)**  
21  $p=0.0145$ ,  $t=2.855$ ,  $df=12$ ; **(n)**  $p=0.0428$ ,  $t=2.470$ ,  $df=7$ ; **(o)**  $p=0.0159$ ,  $U=0$ . In addition, post  
22 hoc multiple comparisons for **(d,e,j)** are Holm-Sidak test, and are  $*p<0.05$ ,  $**p<0.01$ ,  $***p<$   
23  $0.001$ , and  $****p<0.0001$ . The total number of samples analyzed were as follows: **(b)** 6-9  
24 animals per group replicated 3 times; **(c)** 4 animals per group replicated 3 times; **(d)** 4-8 animals  
25 per group replicated 3 times; **(e)** 4-5 animals per group replicated 3 times; **(g-h)** 6 animals per

1 group; **(i-j)** 4 animals per group subfraction preparation replicated 3 times for 99 time points  
2 **(s); (l)** 3-5 animals per group; **(m-n)** 5-9 animals per group; **(o)** 4-5 animals per group.

3

4

5 **Figure 3. *ACLY* expression rescues  $\alpha$ -tubulin acetylation and molecular transport defects**  
6 **upon loss of *Elongator* activity in mouse and fly neurons.**

7 **(a)** Immunolabelings and quantification of acetylated  $\alpha$ -tubulin (Ac  $\alpha$ -Tub) and total tubulin  
8 (Tot Tub) in 3<sup>rd</sup> instar larvae of *Drosophila melanogaster* control or expressing *Acly* RNAi  
9 (*Acly* KD) under a motoneuron-specific driver (D42:GAL4). Scale bar is 10  $\mu$ m. **(b-d)** Time-  
10 lapse recording of Synaptotagmin-GFP (Syt1-GFP) axonal transport in 3<sup>rd</sup> instar larvae motor  
11 neurons of control or *Acly* KD to analyze average (av.) velocity **(b)**, moving velocity **(c)** and  
12 percentage of pausing time **(d)**. **(e)** Immunoblotting and quantification of *Acly* and total tubulin  
13 expressions in *Drosophila melanogaster* head extracts from control or *Elp3* RNAi (*Elp3* KD)  
14 (under the pan-neuronal driver, *Elav:GAL4*) adult flies. **(f)** Immunolabelings and  
15 quantification of acetylated  $\alpha$ -tubulin (Ac  $\alpha$ -Tub) and total tubulin (Tot Tub) in motoneuron  
16 axons of 3<sup>rd</sup> instar larvae: control, *Elp3* KD and *Elp3* KD + human *ACLY*. Scale bar is 10  $\mu$ m.  
17 **(g-k)** *In vivo* live imaging and behavior measurements in 3<sup>rd</sup> instar larva: control, *Elp3* KD and  
18 *Elp3* KD + human *ACLY*. **(g-i)** Time-lapse recording of axonal transport of Synaptotagmin-  
19 GFP (Syt1-GFP) in motoneurons to analyze average (av.) velocity **(g)**, moving velocity **(h)**,  
20 and percentage of pausing time **(i)**. **(j-k)** Locomotion assays; histograms of climbing index of  
21 adult flies **(j)** and crawling speed of 3<sup>rd</sup> instar larvae **(k)**. **(l)** Immunolabelings (axons are shown)  
22 and quantification of acetylated  $\alpha$ -tubulin (Ac  $\alpha$ -Tub) and total tubulin (Tot Tub) in cultured  
23 cortical PNs from E14.5 WT and *Elp3cKO* embryos transfected with *ACLY* or control. Scale  
24 bar is 10  $\mu$ m. **(m-o)** cortical neurons isolated from E14.5 WT and *Elp3cKO* embryos were  
25 transfected with control or *ACLY* expressing constructs and cultured for 5 DIV in microfluidic



1 devices to perform time-lapse recording of axonal transport and measure average (av.) velocity  
2 (**m**), moving velocity (**n**) and percentage of pausing time (**o**) of lysosomes (LysoTracker®).  
3 Description of graphical summaries here within are histograms of means  $\pm$  SEM, while  
4 statistical analyses of (**a,e**) are two-tailed t-test, (**b, c, d**) are Mann-Whitney test, (**f, h, j, k, l**)  
5 are one-way analysis of variance (ANOVA), (**g, i, m, n, o**) is Kruskal Wallis one-way ANOVA.  
6 Specifically, [(**a**)  $p=0.0004$ ,  $t=3.690$ ,  $df=99$ ; (**b**)  $p<0.0001$ ,  $U=24389$ ; (**c**)  $p=0.0007$ ,  $U=3453$   
7 and  $p=0.0072$ ,  $U=4945$  for anterograde and retrograde, respectively; (**d**)  $p<0.0001$ ,  $U=30545$ ;  
8 (**e**)  $p=0.031$ ,  $t=2.407$ ,  $df=13$ ; (**f**)  $p=0.0003$ ,  $F=9.158$ ; (**g**)  $p<0.0001$ ,  $K=21.66$ ; (**h**)  $p<0.0001$ ,  
9  $F=25.90$  and  $p<0.0001$ ,  $F=20.96$  for anterograde and retrograde, respectively; (**i**)  $p<0.0001$ ,  
10  $K=22.35$ ; (**j**)  $p<0.0001$ ,  $F=28.45$ ; (**k**)  $p<0.0001$ ,  $F=139.5$ ; (**l**)  $p=0.0042$ ,  $F=4.969$ ; (**m**)  
11  $p<0.0001$ ,  $K=28.69$ ; (**n**)  $p=0.001$ ,  $K=13.85$  and  $p<0.0001$ ,  $K=251.5$ ; (**o**)  $p<0.0001$ ,  $K=24.74$ .  
12 In addition, post hoc multiple comparisons for (**f**) is Dunnett's test, for (**h**) is Holm-Sidak's test,  
13 for (**g,i**) are Dunn's test, for (**j,k,l,m,n,o**) are Sidak's test and are \* $p<0.05$ , \*\* $p<0.01$ , \*\*\* $p<$   
14  $0.001$ , and \*\*\*\* $p<0.0001$ . The total number of samples analyzed were as follows: (**a**) 50 to  
15 57 motoneurons from at least 6 larvae per group; (**b-d**) 170-421 vesicles coming from 12  
16 different larvae per group (at least 3 images per animal); (**e**) 7-8 flies per group; (**f**) 12 to 37  
17 neurons from at least 3 different mice per group; (**g-i**) 78-304 vesicles tracks from 5-10 larvae  
18 per group; (**j**) 8-9 test per group containing 10 adult flies; (**k**) 11 to 15 larvae per group, (**l**) 23-  
19 28 neurons coming from 3-5 different mice per group; (**m-o**) 343 to 443 vesicles tracks coming  
20 from 3-5 different mice per group (at least 5 images per mouse).

21

22 **Figure 4. ACLY expression rescues defects of  $\alpha$ -tubulin acetylation and microtubule-**  
23 **dependent transport in human FD fibroblasts.**

24 (**a**) Immunoblotting of ACLY and  $\beta$ -ACTIN in human primary fibroblast extracts from  
25 Control and FD patients. (**b**) Immunolabelings and quantification of acetylated  $\alpha$ -tubulin (Ac

1  $\alpha$ -Tub) and total tubulin (Tot Tub) in primary fibroblasts from healthy controls and FD patients  
2 incubated with ACLY inhibitor hydroxycitrate (HCA). Scale bar is 50  $\mu$ m. (c)  
3 Immunolabelings and quantification of acetylated  $\alpha$ -tubulin and (Ac  $\alpha$ -Tub) total tubulin (Tot  
4 Tub) in extracts from primary fibroblasts of healthy controls and FD patients transfected with  
5 control or ACLY expressing plasmids. Scale bar is 50  $\mu$ m. (d-f) Time-lapse recording of intra-  
6 cellular lysosome transport (LysoTracker®) in fibroblasts from Control or FD patients,  
7 transfected with Control or ACLY plasmids, to analyze average (av.) velocity (d), moving  
8 velocity (e) and percentage of pausing time (f). (g) Summary scheme showing a central role  
9 played by Acly in both the control of  $\alpha$ -tubulin acetylation and microtubule-dependent  
10 transport, which is impaired upon loss of Elongator activity. Description of graphical  
11 summaries here within are histograms of means  $\pm$  SEM, while statistical analyses of (a) is two-  
12 tailed t-test, (b) is two-way ANOVA, (c) is one-way analysis of variance (ANOVA), (d, e, f)  
13 are Kruskal Wallis one-way ANOVA. Specifically, [ (a)  $p=0.0467$ ,  $t=2.181$ ,  $df=14$ ; (b)  
14  $p=0.0038$ ,  $F_{\text{interaction}}(2, 109) = 5.876$ ; (c)  $p<0.0001$ ,  $F=13.17$ ; (d)  $p<0.0001$ ,  $K=48.95$ ; (e)  
15  $p<0.0001$ ,  $K=35.10$ ; (f)  $p<0.0001$ ,  $K=40.98$ . In addition, post hoc multiple comparisons for (b)  
16 is Sidak's test, for (c) is Dunnett's test, for (d, e, f) are Dunn's test, and are \* $p<0.05$ , \*\*\* $p<$   
17  $0.001$ , and \*\*\*\* $p<0.0001$ . The total number of samples analyzed were as follows: (a) 5 human  
18 primary fibroblasts per group; (b, c) 15 to 26 human primary fibroblasts from 4-5 human  
19 primary fibroblasts per group; (d-f) 15 images per group from 5 human primary fibroblasts per  
20 group; 143-217 vesicles tracks from human fibroblast cells from 5 human primary fibroblasts  
21 per group (at least 5 images per sample).

22

23 ***Figure S1. Kymographs of motile lysosomes, mitochondria and Synaptotagmin-GFP. RNAi***  
24 ***targeting efficiency and neuromuscular junction assessment in fly model.***

1 **(a-f)** Axonal transport recordings in E14.5 mice cortical neurons cultured for 5 DIV in  
2 microfluidic devices for time-lapse recording of axonal transport from WT or *Elp3 cKO*  
3 neurons to analyze average (av.) velocity (**a, d**), moving velocity (**b, e**) and percentage of  
4 pausing time (**c, f**) of lysosomes (LysoTracker®) and mitochondria (MitoTracker®). **(g)**  
5 Representative kymographs of Lysosomes (**top**) and Mitochondria (**bottom**) in E14.5 in *WT*  
6 or *Elp3cKO* mice cortical neurons axons cultured for 5 DIV in microfluidic devices. Scale bars  
7 are 10 seconds and 5  $\mu\text{m}$ . **(h-i)** Immunoblotting of *Elp3* and  $\beta$ -Actin in cortical neurons  
8 transfected with sh-*Elp3* or sh-*control*. **(j)** Immunoblotting of Acetylated  $\alpha$  tubulin (Ac  $\alpha$ -Tub),  
9 Total  $\alpha$  tubulin (Tot  $\alpha$ -Tub) and  $\beta$ -Actin in E14.5 WT and *Atat1 KO* mice brain cortex. **(k-m)**  
10 Axonal transport study of mitochondria (MitoTracker®) in WT or *ATATI KO* neurons infected  
11 either with sh-Control or sh-*Elp3* to analyze average (av.) velocity (**k**), moving velocity (**l**) and  
12 percentage of pausing time (**m**). **(n)** Representative kymographs of Lysosomes (**top**) and  
13 Mitochondria (**bottom**) in E14 in WT or *ATATI KO* neurons infected either with sh-Control  
14 or sh-*Elp3* mice cortical neurons axons cultured for 5 DIV in microfluidic devices. Scale bars  
15 are 10 seconds and 5  $\mu\text{m}$ . **(o-p)** qRT-PCR analysis to measure mRNA levels of *Elp1* and *Elp3*  
16 from fly head extracts, expressing RNAi under the pan-neuronal driver (*Elav:GAL4*) in control,  
17 *Elp1* KD (**o**) and *Elp3* KD (**p**). **(q)** Representative kymographs of Synaptotagmin-GFP (*Syt1-*  
18 *GFP*) in motoneurons from 3<sup>rd</sup> instar larvae of *Drosophila melanogaster* expressing RNAi  
19 under a motoneuron-specific driver (*D42:GAL4*); control, *Elp1* KD, *Elp3* KD, *ATATI*; *Elp3*  
20 KD, *Elp3* KD + human *Elp3*, *Elp1;Hdac6* KD and *Elp3;Hdac6* KD. Scale bars are 10 seconds  
21 and 5  $\mu\text{m}$ . **(r)** Protein aggregation was estimated in axons (Tau+; in green) of cultured mice  
22 cortical neurons of WT, *Elp3cKO* and MG132 treated neurons (positive control) by the  
23 chemical dye Proteostat© as marker for protein aggregation (in red). Scale bar is 10  $\mu\text{m}$ . **(s)**  
24 Protein aggregation was estimated in motor neurons exiting the ventral ganglion of 3<sup>rd</sup> instar  
25 larvae expressing RNAi under motoneurons specific driver (*D42:GAL4*); control, *Elp1* KD,

1 *Elp3* KD and *MGI32* treatment (positive control) by immunolabeling of cysteine string  
2 protein(CSP+; red) as marker for aggregation and the neuronal marker horseradish peroxidase  
3 (HRP+; blue). Scale bar is 10  $\mu$ m. (t) Comparison of Elongator complex subunits (ELP1-6)  
4 amino acid homology from mice and flies with human by sequence identity and similarity. (u)  
5 Representative images (**right**) of neuromuscular junctions in 3<sup>rd</sup> instar larvae immunolabeled  
6 for cysteine string protein (CSP) and horseradish peroxidase (HRP) and a histogram of its  
7 quantification (**left**). Description of graphical summaries here within are histograms of means  
8  $\pm$  SEM, while statistical analyses of (a, b, c, d, e, f, h, o, p, u) are Mann-Whitney test, (k, l, m)  
9 are Kruskal Wallis one-way ANOVA. Specifically, [(a)  $p < 0.0001$ ,  $U = 111906$ ; (b)  $p < 0.0001$ ,  
10  $U = 71910$  and  $p = 0.0029$ ,  $U = 45529$  for anterograde and retrograde, respectively ; (c)  $p < 0.0001$ ,  
11  $U = 68287$ ; (d)  $p < 0.0001$ ,  $U = 21672$ ; (e)  $p = 0.0349$ ,  $U = 20092$  and  $p = 0.0002$ ,  $U = 27975$  for  
12 anterograde and retrograde, respectively; (f)  $p < 0.0001$ ,  $U = 21907$ ; (h)  $p = 0.0286$ ,  $U = 0$  ; (k)  
13  $p < 0.0001$ ,  $K = 67.88$ ; (l)  $p < 0.0001$ ,  $K = 25.42$  and  $p < 0.0001$ ,  $K = 25.89$  for anterograde and  
14 retrograde, respectively; (m)  $p < 0.0001$ ,  $K = 73.34$ ; (o)  $p = 0.0159$ ,  $U = 0$ ; (p)  $p = 0.0159$ ,  $U = 0$ ; (u)  
15  $p = 0.6905$ ,  $U = 10$ ]. In addition, post hoc multiple comparisons for (k, l, m) are Dunn's test, and  
16 are \* $p < 0.05$ , \*\* $p < 0.01$ , \*\*\* $p < 0.001$ , and \*\*\*\* $p < 0.0001$ . The total number of samples  
17 analyzed were as follows: (a, c, e) 423 to 712 vesicles tracks from 5 different mice per group;  
18 (b, d, f) 232 to 239 vesicles tracks from 5 different mice per group; (h) 4 animals per group;  
19 (k, l, m) 83 to 201 vesicles tracks from 3 different mice per group; (o, p) 4 to 5 fly's brain per  
20 group; (u) 5 3<sup>rd</sup> instar larvae per group (average of 3-5 NMJs each).

21

## 22 **Figure S2. LC-MS/MS and Acly levels in E14.5 cortical brains**

23 (a) LC-MS/MS proteomic analysis of vesicular fraction isolated from adult brain cortices of  
24 WT and *Elp1* cKO mice, proteins were ranked by intensity and plotted according to their  
25 relative abundance (gray spots). Acly (pink), *Atat1* (yellow), and Elongator subunits (red)

1 detection among proteins previously identified as vesicular components (purple), small GTPase  
2 (blue) and molecular motors (green) (n = 3, graph represent the mean intensity value). **(b)**  
3 Immunoblotting to detect Elp1, Elp3 and  $\alpha$ -tubulin ( $\alpha$ -Tub) in cortical extracts from adult WT  
4 and *Elp1 cKO* mice. **(c)** Immunoblotting to detect Elp3 and Cre. **(d)** Immunoblotting to detect  
5 Elp3, Ac  $\alpha$ -Tubulin,  $\alpha$ -Tubulin ( $\alpha$ -Tub) and Acly in cortical extracts from E14.5 WT and *Elp3*  
6 *cKO* mice (n=2 to 3 E14.5 mouse embryos).

7

8 **Figure S3. Expression of ACLY in mice cultured neurons and fly heads. Kymographs after**  
9 **time-lapse recording of motile lysosomes, mitochondria and Synaptotagmin-GFP<sup>+</sup> vesicles**

10 **(a)** Representative kymographs of Synaptotagmin-GFP (Syt1-GFP) in motoneurons from 3<sup>rd</sup>  
11 instar larvae of *Drosophila melanogaster* expressing RNAi under a motoneuron-specific driver  
12 (D42:GAL4); control and *Acly* KD. Scale bars are 10 seconds and 5  $\mu$ m. **(b)** Comparison of  
13 *Acly* amino acid homology from mice and flies with human by sequence identity and similarity.  
14 **(c)** Representative kymographs of Synaptotagmin-GFP (Syt1-GFP) in 3<sup>rd</sup> instar larvae motor  
15 neurons expressing RNAi under a motoneuron-specific driver (D42:GAL4); control, *Elp3* KD  
16 and *Elp3* KD + *ACLY*. Scale bars are 10 seconds and 5  $\mu$ m. **(d-f)** E14.5 mice cortical neurons  
17 cultured for 5 DIV in microfluidic devices for time-lapse recording of axonal transport of  
18 mitochondria (MitoTracker®) from *WT* or *Elp3cKO* neurons transfected with control or *Acly*  
19 expressing constructs, to analyze average (av.) velocity **(d)**, moving velocity **(e)** and percentage  
20 of pausing time **(f)**. **(g)** Representative kymographs of Lysosomes **(top)** and Mitochondria  
21 **(bottom)** in E14.5 in *WT* or *Elp3cKO* mice cortical neurons axons transfected with *ACLY* or  
22 Control carrying construct and cultured for 5 DIV in microfluidic devices. Scale bars are 10  
23 seconds and 5  $\mu$ m. Description of graphical summaries here within are histograms of means  $\pm$   
24 SEM, while statistical analyses of **(d, e, f)** are Kruskal Wallis one-way ANOVA. Specifically,  
25 [**(d)** p<0.0001, K=27.47; **(e)** p<0.0001, K=26.16 and p=0.0003, K=16.04 for anterograde and

1 retrograde, respectively; (**f**)  $p < 0.0001$ ,  $K=49.32$ ]. In addition, post hoc multiple comparisons for  
2 (**d**, **e**, **f**) are Dunn's test, and are  $*p < 0.05$ ,  $***p < 0.001$ , and  $****p < 0.0001$ . The total number  
3 of samples analyzed were as follows: (**d**, **e**, **f**) 283 to 340 vesicles tracks from 5 different mice  
4 per group.

5 ***Figure S4. Pharmacological and genetic rescue of vesicular transport in FD fibroblasts.***

6 ***Kymographs form time-lapse recorded motile lysosomes in human primary fibroblasts.***

7 (**a**) Immunoblotting of ELP1, ELP3 and  $\beta$ -ACTIN in human primary fibroblasts from control  
8 and FD patients. (**b**) Immunolabelings and quantification of acetylated  $\alpha$ -tubulin (Ac  $\alpha$ -Tub)  
9 and total tubulin (Tot Tub) in human primary fibroblasts from healthy controls and FD patients  
10 incubated with vehicle or Tubastatin (TBA). Scale bar is 50  $\mu$ m. (**c-e**) Detection of lysosomes  
11 using live fluorescent probe (LysoTracker®) in human primary fibroblasts for time-lapse  
12 recording of intracellular transport in control or FD cultured fibroblasts incubated with vehicle  
13 (DMEM media) or TBA to analyze average (av.) velocity (**c**), moving velocity (**d**) and  
14 percentage of pausing time (**e**). (**f**) Representative kymographs of transported lysosomes in  
15 human primary fibroblasts from healthy controls or FD patients incubated with vehicle  
16 (DMEM media) or Tubastatin (TBA). Scale bars are 10 seconds and 5  $\mu$ m. (**g**) In vitro  
17 deacetylation assay of endogenously acetylated bovine brain tubulin incubated for 4 hours with  
18 extracts of control and FD cultured fibroblasts or without tissue extract (control). (**h**) Protein  
19 aggregation was estimated in fibroblasts from healthy controls and FD patients after incubation  
20 with the chemical dye Proteostat®, a marker for protein aggregation (in red). Scale bar is 50  
21  $\mu$ m. (**i**) Representative kymographs of transported lysosomes in human primary fibroblasts  
22 from healthy controls or FD patients transfected with ACLY or Control carrying constructs.  
23 Scale bars are 10 seconds and 5  $\mu$ m. Description of graphical summaries here within are  
24 histograms of means  $\pm$  SEM, while statistical analyses of (**b**) one-way analysis of variance  
25 (ANOVA), (**c**, **d**, **e**) are Kruskal Wallis one-way ANOVA (**g**) is one-way ANOVA and (**h**) is

1 Mann-Whitney test. Specifically, [(b)  $p < 0.0001$ ,  $F = 30.36$ ; (c)  $p < 0.0001$ ,  $K = 24.26$ ; (d)  
2  $p < 0.0001$ ,  $K = 23.82$ ; (e)  $p < 0.0001$ ,  $K = 44.79$ ; (g)  $p = 0.3398$ ,  $U = 60$ ]. In addition, post hoc  
3 multiple comparisons for (b) is Dunnett's test, for (c, d, e) are Dunn's test, and are  $*p < 0.05$ ,  
4  $***p < 0.001$ , and  $****p < 0.0001$ . The total number of samples analyzed were as follows: (a)  
5 lysates from five independent cultures of control and FD patient fibroblasts; (b) average of 13  
6 to 30 fibroblasts neurons from 5 human primary fibroblasts from control and FD patients (3  
7 technical replicates each). (c, d, e) 225 to 273 vesicles tracks from 5 different human primary  
8 fibroblasts from control and FD patients (3 technical replicates each); (g) 4-5 extracts 5 of  
9 human primary fibroblasts from control and FD patients (h) average of 12 to 13 fibroblasts  
10 from 5 human primary fibroblasts of control and FD patients (3 technical replicates each).

11

## 12 **Material and Methods**

13

### 14 **Mice**

15 Brains were harvested from mice at P0-P2 or E14.5. *FoxG1:Cre*<sup>-/+</sup>/*Elp3*<sup>lox/+</sup> and *Elp3*<sup>lox/lox</sup>  
16 mice were time-mated to induce a loss of function of *Elp3* in the forebrain (48). Brains were  
17 harvested from 10-16 months-old *Elp1*cKO and WT mice (27).

18 *Atat1*<sup>+/-</sup> mice were bred to obtain WT and KO mice (49). Mice were housed under standard  
19 conditions and they were treated according to the guidelines of the Belgian Ministry of  
20 Agriculture in agreement with the European Community Laboratory Animal Care and Use  
21 Regulations (86/609/CEE, Journal Official des Communautés Européennes L358, 18  
22 December 1986).

23 Neuronal cultures were prepared from dissected E14.5 mice brain cortices, followed by  
24 mechanical dissociation in HBBS (Sigma-Aldrich, H6648) supplemented with 1.5% glucose.

25 Cells were cultured at confluence of ~70% with Neurobasal Medium (Gibco, Invitrogen,

1 21103049) supplemented with 2% B27 (Gibco, Invitrogen, 17504044), 1% Pen/Strep (Gibco,  
2 Invitrogen, 15140122) and 1% Glutamax (Gibco, Invitrogen, 35050061) at 37°C.

3

#### 4 *Drosophila melanogaster*

5 Flies were kept in 25°C incubator with regular 12-hour light and dark cycle. All crosses were  
6 performed at 25°C, after two days hatched first instar larvae were transferred in a 29°C  
7 incubator until use.

8 UAS-RNAi carrying lines were crossed with virgin females were crossed with of D42-Gal4-  
9 UAS:Syt1-GFP for axonal transport recording, or with D42-Gal4 for behavioral experiments  
10 and immuno-staining, or with Elav-Gal4 for qPCR and WB analysis. All RNAi inserts  
11 sequences were validated by DNA sequencing.

12

#### 13 *Drosophila melanogaster* lines:

| Line          | Catalog number | Given Name | Purchased from                         |
|---------------|----------------|------------|----------------------------------------|
| Elav-Gal4     | BDSC 458       |            | Bloomington Drosophila<br>Stock Center |
| huD42-Gal4    | BDSC 8816      |            | Bloomington Drosophila<br>Stock Center |
| UAS:Syt-GFP   | BDSC 6925      |            | Bloomington Drosophila<br>Stock Center |
| UAS:RNAi Zpg  | VDRC CG10125   | Control    | Vienna Drosophila Resource<br>Center   |
| UAS:RNAi Elp1 | VDRC CG10535   | Elp1 KD    | Vienna Drosophila Resource<br>Center   |



|                |              |          |                                       |
|----------------|--------------|----------|---------------------------------------|
| UAS:RNAi Elp3  | VDRC CG15433 | Elp3 KD  | Vienna Drosophila Resource Center     |
| UAS:RNAi Atat1 | VDRC CG3967  | Atat1 KD | Vienna Drosophila Resource Center     |
| UAS:RNAi Hdac6 | BDSC 51181   | Hdac6 KD | Bloomington Drosophila Stock Center   |
| UAS:Human Elp3 |              | hElp3    | Kindly provided by Patrick Verstreken |
| UAS:Human ACLY | VDRC CG8322  | hACLY    | Vienna Drosophila Resource Center     |

1

## 2 Human primary fibroblasts

3 Fibroblasts were cultured in polystyrene culture flasks (Corning) at 37°C with 5% CO<sub>2</sub> in  
4 DMEM (Gibco, Invitrogen, 11965092) medium supplemented with 10% Fetal Calf Serum  
5 (Gibco, Invitrogen, 10500056), 1 mM Sodium pyruvate (Gibco, Invitrogen, 11360070), 1 mM  
6 non-essential amino acids (Gibco, Invitrogen, 11140050). Primary fibroblasts from five FD  
7 patients and age matched controls were purchased from Coriell biobank ([www.coriell.org](http://www.coriell.org)).

8

| Catalog number | Sex    | Age | Sample Description    |
|----------------|--------|-----|-----------------------|
| GM02036        | Female | 11  | Apparently Healthy    |
| GM07492        | Male   | 17  | Apparently Healthy    |
| GM07522        | Female | 19  | Apparently Healthy    |
| GM038          | Female | 3   | Apparently Healthy    |
| GM05659        | Male   | 14  | Apparently Healthy    |
| GM02343        | Female | 24  | Familial Dysautonomia |

|         |        |    |                       |
|---------|--------|----|-----------------------|
| GM04589 | Male   | 16 | Familial Dysautonomia |
| GM04663 | Female | 2  | Familial Dysautonomia |
| GM04959 | Female | 10 | Familial Dysautonomia |
| GM04899 | Female | 12 | Familial Dysautonomia |

1

## 2 **Immunofluorescence**

3 E14.5 cortical neurons were plated on coverslips in 24 well plate at density of 30,000 cells and  
4 cultured for 5DIV. Neurons were fixed by incubation in 4% PFA in PBS for 20 minutes at RT  
5 and washed with PBS+0.3% Triton-X. After washing, neurons were incubated in blocking  
6 solution (PBS+0.3% Triton-X+10% normal donkey serum) for 1 hour at RT. Following  
7 overnight incubation with primary antibodies in blocking solution at 4°C, washing, and  
8 incubation with secondary antibodies (PBS+0.3% Triton-X+1% normal donkey serum) at RT  
9 for 1 hour and washing, coverslips were then mounted on microscope slide using Mowiol.  
10 Images were acquired using Nikon, A1Ti, confocal microscope, 60X lens or Airyscan super-  
11 resolution module on a Zeiss LSM-880 confocal.

12 Larvae were dissected in PBS to expose brain and motor neurons, after dissection larvae were  
13 fixed with 4% PFA for 20 minutes at RT, washed with PBS+0.2% (CSP staining) or 0.3% ( $\alpha$ -  
14 Tubulin acetylation staining) Triton-X and incubated in blocking solution PBS, 0.2% (CSP  
15 staining) or 0.3% ( $\alpha$ -Tubulin acetylation staining) Triton-X+1% BSA for 30 minutes at RT.  
16 Following overnight incubation with primary antibodies at 4°C, washing and incubation with  
17 secondary antibodies at RT for 2 hours the larvae were mounted on microscope slide in  
18 Mowiol. Images were acquired using Nikon, A1Ti, confocal microscope, 60X lens or Airyscan  
19 super-resolution module on a Zeiss LSM-880 confocal.

20 Primary fibroblasts from FD patients or controls were plated at concentration of 5,000 cells in  
21 96 well plate (uClear, Grinere). Cells were fixed with 4% PFA for 10 minutes, washed three

1 times with PBS, permeabilized and blocked for 1 hour at RT with 5% fetal bovine serum in  
2 PBS+0.1% Triton-X. Following overnight incubation with acetylated  $\alpha$ -tubulin (Sigma-  
3 Aldrich) and  $\beta$ -tubulin (cell signaling) antibodies, cells were washed three times with  
4 PBS+0.05% Triton-X times and incubated with secondary antibodies for 1hour at RT. Finally,  
5 the cells were washed three times, and remained in PBS for image acquisition. Images were  
6 acquired using in-cell 2200 (General Electric) fluorescent microscope using 60X air lens.  
7 Fluorescence intensity levels were measured by Fiji (<https://imagej.net/Fiji/Downloads>). For  
8 mice cortical neurons and fly MNs ROIs of 30  $\mu$ m long axon accounting for the full width of  
9 the axons were used. For human primary fibroblasts, ROI were performed marking the entire  
10 cell was used. The  $\alpha$ -tubulin acetylation levels were extracted from mean intensity levels.  
11 Background levels were subtracted and the ratio of acetylated  $\alpha$ -tubulin/ $\alpha$ -tubulin was  
12 calculated.

13

#### 14 **Vesicular and mitochondrial transport recording in vitro and in vivo**

15 Axonal transport in mice cultured cortical neurons was recorded in microfluidics devices,  
16 prepared as described in (50). Briefly, air bubbles were removed from mixed sylgard 184  
17 elastomer (VossChemie Benelux, 1:15 ratio with curing agent) by centrifuging at 1,000xg for  
18 5 minutes. Liquid was poured into the microfluidic device mold and was cured by 3 hours  
19 incubation at 70°C incubator. Molds were cut and washed twice with 70% ethanol, air dry in  
20 biological hood and placed on 35 mm glass bottom dishes (MatTek, P35G-0-20-C). To increase  
21 the adhesiveness the microfluidic chambers and dishes were heated to 70°C, and placed on  
22 dishes. The day of the culture medium supplemented with 50 ng/ml or 20 ng/ml BDNF  
23 (PeproTech, 450-02) was added to the microfluidic devices distal or soma side, respectively.  
24 Labeling were done on after 5DIV by adding 1  $\mu$ M LysoTracker® Red DND-99  
25 (ThermoFisher Scientifics, L7528), MitoTracker® Green FM (ThermoFisher Scientifics,

1 M7514) or MitoTracker® Deep Red FM (ThermoFisher Scientifics, M22426) 30 minutes prior  
2 to time-lapse recordings. Recording of mice cortical neurons and *Drosophila melanogaster*  
3 MNs was performed on an inverted confocal microscope Nikon, A1Ti, at 600 ms frame  
4 interval. Recordings of human primary fibroblasts were performed using in-cell 2200 (General  
5 Electric) using 60X air lens, at 2 seconds frame intervals, using temperature (37°C) and CO<sub>2</sub>  
6 control.

7 Axonal transport recording in *Drosophila Melanogaster* MNs were done on 3<sup>rd</sup> instar larvae  
8 expressing UAS:RNAi and Syt1-GFP. Larvae were anaesthetized with ether vapors (8 minutes)  
9 and mounted dorsally on microscope slide using 80% glycerol.

10 Intra-cellular transport in human primary fibroblasts were done on cultured primary fibroblasts  
11 3 days after plating, by adding 1 µM LysoTracker® Red DND-99 (ThermoFisher Scientifics,  
12 L7528) 30 minutes prior to time-lapse recordings.

13 Video analysis were performed by generation of kymographs for single blind analysis using  
14 ImageJ plugin-KymoToolBox ([fabrice.cordelieres@curie.u-psud.fr](mailto:fabrice.cordelieres@curie.u-psud.fr)). For *Drosophila*  
15 *melanogaster* analysis StackReg plugin was used to align frames. Vesicles were considered  
16 stationary if speed was lower than 0.1 µm/sec.

17

## 18 **Plasmids and drug treatments**

19 For silencing of *Elp3* we inserted sh-*Elp3* 5'GCACAAGGCUGGAGAUCGGUU3' or a  
20 control sequence sh-Control 5'-TACGCGCATAAGATTAGGG-3' previously described in  
21 (25, 51). The viral packaging vector is PSPAX2 and envelope is VSV-G. The lentiviral vector  
22 is pCDH-cmv-EF1-copGFP (CD511B1), and the promotor was replaced by a U6 promoter.

23 For expression of human ACLY E14.5 cortical neurons in suspension were transfected with  
24 pEF6-Acly (Addgene plasmid # 70765, a gift from Kathryn Wellen) (52) or pEF6 (control)  
25 and GFP (from VPG-1001, Lonza) using Mouse Neuron Nucleofector® Kit (VPG-1001,

1 Lonza) according to manufacturer's protocol. GFP positive neurons were used for analysis.  
2 For expression of human ACLY cultured human primary fibroblasts were transfected with  
3 pEF6-Acly (Addgene plasmid # 70765, a gift from Kathryn Wellen) (52) or pEF6 (control)  
4 and GFP (from VPG-1001, Lonza) using Lipofectamine® 2000 according to manufacturer's  
5 protocol. GFP positive cells were used for analysis. Tubastatin A (TBA, 20µM) or Hydroxy-  
6 citrate (HCA, 3mM or 10mM) were dissolved in Ultra-Pure Water (UPW) and added to cell  
7 cultures 2 hours or 8 hours, respectively, prior to recording.

8

### 9 Real Time Quantitative PCR analysis (qRT-PCR)

10 One mouse cortex or ten adult fly heads were collected in TRIzol Reagent (Ambion, Life  
11 Technologies) followed by RNA extraction performed using the manufacturer's  
12 instructions. After DNase treatment (Roche), 1 µg of RNA was reverse transcribed with  
13 RevertAid Reverse Transcriptase (Fermentas). RT-qPCR was performed using Quant Studio  
14 (Thermo) and TaqMan primers for mice, or a Light Cycler 480 (Roche) with Syber Green  
15 mix for *Drosophila melanogaster*. Analyses were done using 2<sup>-ΔΔCT</sup> method (53).

16

| Gene         | Forward                | Reverse               | Organism |
|--------------|------------------------|-----------------------|----------|
| <i>Acly</i>  | Hs00982738_m1 (Thermo) |                       | mice     |
| <i>Gapdh</i> | Mm99999915_g1 (Thermo) |                       | mice     |
| <i>TBP</i>   | CCACGGTGAATCTGTGCT     | GGAGTCGTCCTCGCTCTT    | fly      |
| <i>Elp1</i>  | TCGGCGGTTCCCTTCCAAAC   | GGTCCGATGCAACTTCAGATT | fly      |
| <i>Elp3</i>  | AAGAAGTTGGGCGTGGGATT   | ATCCTTTTTGGCTTCGTGCG  | fly      |

17

### 18 Protein aggregation assay

1 Cultured mice cortical neurons or human primary fibroblasts at 60% confluency were  
2 incubated with PROTEOSTAT® (Enzo LifeSciences) to detect protein aggregates.

3

#### 4 **Locomotion activity and climbing assays**

5 Larval crawling speed assays were performed by placing 3<sup>rd</sup> instar larvae in the center of 15-  
6 cm petri dishes coated with 3% agar as previously published (54), velocities were extrapolated  
7 by measuring the distance traveled in one minute. Climbing assay were performed as  
8 previously described in (55), by measuring the average ratio of successful climbs over 15  
9 cm for 10 adult flies.

10

#### 11 **Western blot**

12 Mouse brain cortices, adult fly heads or human primary fibroblasts were quickly homogenized  
13 on ice in RIPA buffer, or 320 mM sucrose, 4 mM HEPES buffer for subcellular fractions.  
14 Protease inhibitor cocktail (Roche, P8340 or Sigma-Aldrich, S8820) and 5  $\mu$ M Trichostatin-A  
15 (Sigma-Aldrich, T8552) to inhibit protein degradation and  $\alpha$ -tubulin deacetylation.  
16 2  $\mu$ g of protein lysate were used for  $\alpha$ -tubulin acetylation analysis and 20-30  $\mu$ g for all other  
17 proteins. Nitrocellulose membranes were imaged using Amersham Imager 600 (General  
18 Electric, 29083461) and band densitometry was measured using FIJI.

19

| <b>Protein</b>                             | <b>Company</b> | <b>Cat #</b> | <b>WB</b> | <b>IF</b> | <b>ELISA</b> |
|--------------------------------------------|----------------|--------------|-----------|-----------|--------------|
| $\alpha$ -Tubulin                          | Sigma-Aldrich  | T9026        | 1:5,000   |           | 1:2,000      |
| $\alpha/\beta$ -Tubulin<br>(total tubulin) | Cytoskeleton   | ATN02-A      |           | 1:150     |              |
| acetylated $\alpha$ -Tubulin               | Sigma-Aldrich  | T7451        | 1:15,000  | 1:15,000  |              |

|                  |                                   |                 |          |       |         |
|------------------|-----------------------------------|-----------------|----------|-------|---------|
| $\beta$ -Tubulin | cell signaling                    | 2146            |          | 1:100 |         |
| $\beta$ -actin   | Sigma-Aldrich                     | A3853           | 1:20,000 |       |         |
| HDAC6            | Santa Cruz<br>Biotechnology       | sc-5258         | 1:200    |       |         |
| ATAT1            | Max Nachury                       |                 | 1:1000   |       |         |
| Tau-1            | Millipore                         | MAB3420         |          | 1:500 |         |
| CSP              | DSHB                              | DCSP-2<br>(D6D) |          | 1:10  |         |
| ELP1/IKAP        | Anaspec                           | AS-54494        | 1:500    |       |         |
| ELP3             | Jesper Svejstrup                  |                 | 1:1,000  |       |         |
| Synaptophysin    | Sigma-Aldrich                     | s5768           | 1:1,000  |       |         |
| ACLY             | cell signaling                    | <u>13390</u>    | 1:1,000  |       |         |
| goat anti mouse  | Jackson<br>ImmunoResearch<br>Labs | 115-035-003     | 1:10,000 | 1:200 | 1:5,000 |
| goat anti rabbit | Jackson<br>ImmunoResearch<br>Labs | 111-035-003     | 1:10,000 | 1:200 |         |
| donkey anti goat | Jackson<br>ImmunoResearch<br>Labs | 705-035-003     | 1:10,000 |       |         |

1

## 2 Subcellular Fractionation

3 Subcellular fractionation of frozen mice brain cortex was performed as previously described

4 (30).

1

## 2 **Mass Spectrometry Analysis**

3 Pellets from three independent samples of pooled vesicles isolated from brain cortex of WT or  
4 *Elp1* cKO mice were solubilized using 5% SDS. The samples were dissolved in 10mM DTT  
5 100mM Tris and 5% SDS, sonicated and boiled in 95<sup>o</sup> C for 5 minutes. The samples were  
6 precipitated in 80% acetone. The protein pellets were dissolved in in 9M Urea and 100mM  
7 ammonium bicarbonate than reduced with 3mM DTT (60°C for 30 min), modified with 10mM  
8 iodoacetamide in 100mM ammonium bicarbonate (room temperature for 30 minutes in the dark)  
9 and digested in 2M Urea, 25mM ammonium bicarbonate with modified trypsin (Promega),  
10 overnight at 37°C in a 1:50 (M/M) enzyme-to-substrate ratio. The resulting tryptic peptides were  
11 desalted using C18 tips (Harvard) dried and re-suspended in 0.1% Formic acid. They were  
12 analyzed by LC-MS/MS using Q Exactive plus mass spectrometer (Thermo) fitted with a  
13 capillary HPLC (easy nLC 1000, Thermo). The peptides were loaded onto a homemade capillary  
14 column (20 cm, 75 micron ID) packed with Reprosil C18-Aqua (Dr Maisch GmbH, Germany)  
15 in solvent A (0.1% formic acid in water). The peptides mixture was resolved with a (5 to 28% )  
16 linear gradient of solvent B (95% acetonitrile with 0.1% formic acid) for 60 minutes followed by  
17 gradient of 15 minutes gradient of 28 to 95% and 15 minutes at 95% acetonitrile with 0.1%  
18 formic acid in water at flow rates of 0.15 µl/min. Mass spectrometry was performed in a positive  
19 mode using repetitively full MS scan followed by high collision induces dissociation (HCD, at  
20 35 normalized collision energy) of the 10 most dominant ions (>1 charges) selected from the first  
21 MS scan. The mass spectrometry data was analyzed using the MaxQuant software 1.5.1.2.  
22 ([//www.maxquant.org](http://www.maxquant.org)) using the Andromeda search engine, searching against the mouse uniprot  
23 database with mass tolerance of 20 ppm for the precursor masses and 20 ppm for the fragment  
24 ions. Peptide- and protein-level false discovery rates (FDRs) were filtered to 1% using the target-  
25 decoy strategy. Protein table were filtered to eliminate the identifications from the reverse



1 database, and common contaminants and single peptide identifications. The data was quantified  
2 by label free analysis using the same software, based on extracted ion currents (XICs) of peptides  
3 enabling quantitation from each LC/MS run for each peptide identified in any of experiments.

4

#### 5 **In vitro $\alpha$ -tubulin assay**

6 *In vitro*  $\alpha$ -tubulin acetylation assay was performed as previously described (30).

7

#### 8 **$\alpha$ -Tubulin deacetylation assay**

9  $\alpha$ -Tubulin deacetylation assay was performed as previously described in (38). 96 well half area  
10 plates (Greiner, 674061) were coated with 1  $\mu$ g tubulin in 50  $\mu$ l of ultra-pure water for 2.5  
11 hours at 37°C, followed by blocking (PBS, 3% BSA, 3% skim milk, 3% fetal bovine serum)  
12 for 1 hour at 37°C, and washing with PBS+0.05% Tween-20. 10  $\mu$ g of cytosolic fraction  
13 isolated from newborn mice brain cortex in deacetylation buffer (50 mM Tris-HCl at pH 7.6,  
14 120 mM NaCl, 0.5 mM EDTA) with protease inhibitor cocktail and phosphatase inhibitor (to  
15 avoid dephosphorylation of HDAC6), were added per well for incubation of 4 hours at 37°C  
16 with shaking at 100 RPM. The wells were washed and incubated overnight at 4°C with  
17 acetylated  $\alpha$ -tubulin antibody (1:2,000) in blocking buffer (PBS+0.05% Tween-20 +3%BSA),  
18 wells were washed and incubated for 2 hours at 37°C with Peroxidase conjugated Goat anti  
19 mouse antibody (1: 5,000) in antibody blocking buffer, following another wash samples were  
20 incubated with TMB/E (ES001, Merck Millipore), reaction was stopped with H<sub>2</sub>SO<sub>4</sub>.

21

#### 22 **ACLY activity assay**

23 ACLY activity assay was measured as previously described in (41). Cells or brain extracts were  
24 disrupted by passing them 15 times in 25-gauge needle in 100 mM Tris-HCL buffer,  
25 supplemented with protease and phosphatase inhibitors. 5 $\mu$ g of cells/brain lysate were added

1 to reaction mix (200 mM Tris-HCL PH 8.4, 20 mM MgCl<sub>2</sub>, 20 mM sodium citrate, 1 mM  
2 DTT, 0.1 mM NADH (Sigma-Aldrich, N8129), 6 U/mL Malate dehydrogenase (Sigma-  
3 Aldrich, M1567), 0.5 mM CoA (Sigma-Aldrich, C3019) with or without ATP (Sigma-Aldrich,  
4 A1852). ACLY activity was measured every 100 seconds for 4 hours, in volume of 50ul in 384  
5 well plate using 340nm OD read. ACLY specific activity was calculated as the change in  
6 absorbance with ATP compared to the change without ATP. For statistical comparison ACLY  
7 activity was define as the slope from the linear range of the reaction.

8

### 9 **Acetyl-CoA sample preparation and LC–MS/MS analysis**

10 Acetyl-CoA was extracted as previously described (56). Briefly, cold methanol (500 µl; -  
11 20 °C) was added to the cell pellets, and the mixture was shaken for 30 s (10 °C, 2000 r.p.m.,  
12 Thermomixer C, Eppendorf). Cold chloroform (500 µl; -20 °C) was added, the mixture was  
13 shaken for another 30 seconds, and then 200 µl of water (4 °C) was added. After the mixture  
14 was shaken for 30 seconds and left on ice for 10 minutes, it was centrifuged (21,000×g, 4 °C,  
15 10 min). The upper layer was collected and evaporated. The dry residue was re-dissolved in  
16 eluent buffer (500 µl) and centrifuged (21,000×g, 4 °C, 10 minutes) before placing in LC-MS  
17 vials. Acetyl CoA was analyzed as previously described (57). Briefly, the LC–MS/MS  
18 instrument consisted of an Acquity I-class UPLC system and Xevo TQ-S triple quadrupole  
19 mass spectrometer (both Waters) equipped with an electrospray ion source. LC was performed  
20 using a 100 × 2.1-mm i.d., 1.7-µm UPLC Kinetex XB-C18 column (Phenomenex) with mobile  
21 phases A (10 mM ammonium acetate and 5 mM ammonium hydrocarbonate buffer, pH 7.0,  
22 adjusted with 10% acetic acid) and B (acetonitrile) at a flow rate of 0.3 ml min<sup>-1</sup> and column  
23 temperature of 25°C. The gradient was as follows: 0-5.5 minutes, linear increase 0–25% B,  
24 then 5.5-6.0 minutes, linear increase till 100% B, 6.0-7.0 minutes, hold at 100% B, 7.0-  
25 7.5 minutes, back to 0% B, and equilibration at 0% B for 2.5 minutes. Samples kept at 4°C

1 were automatically injected in a volume of 5  $\mu$ l. Mass spectrometry was performed in positive  
2 ion mode, monitoring the MS/MS transitions  $m/z$  810.02  $\rightarrow$  428.04 and 810.02  $\rightarrow$  303.13 for  
3 acetyl-CoA. Spikes of defined amounts of AcCoA were added to the samples to confirm the  
4 absence of signal inhibition (matrix effect) in the analyzed extracts. Quantification of AcCoA  
5 was done against external calibration curve with 1–1,000 ng ml<sup>-1</sup> range of AcCoA  
6 concentrations using TargetLynx software (Waters).

7

### 8 **Analysis and statistics**

9 All experiments were performed under single blinded condition and statistical analyses were  
10 generated with GraphPad Prism Software 7.0

11

### 12 **Author contributions**

13 A.E., G.M., M.W., and L.N. designed the study. A.E. and G.M. performed and interpreted most  
14 experiments. R.L.B. contributed to *Drosophila* work. M.S. contributed to cell cultures and  
15 biochemical work. S.T. and L.B. performed biochemical experiments with Elp3cKO embryos.  
16 A.B. performed acetyl co-A LC-MS/MS analysis. Shani Inbar performed qPCR analysis. P.D.  
17 and I.D. maintained Elp1 cKO mice colonies and provided brain material. F.S., A.C., B.B, and  
18 J.M.R provided guidance and help for experiments. M.W. and L.N. contributed to data  
19 interpretation; and A.E., G.M., M.W., and L.N. wrote the manuscript with input from all  
20 coauthors.

21

22 **Competing interests:** The authors declare that they have no competing interests.

23

### 24 **Acknowledgements**

1 We thank Maria M. Magiera and Carsten Janke for providing non acetylated Hela Tubulin.  
2 We thank Patrik Verstreken for sharing Elp3KD flies, M. Nachury for sharing ATAT1  
3 antibody and K. Sadoul for providing the Atat1 KO mice, T. Lahusen from American Gene  
4 Technologies for creating viral sh-RNA particles and E. Even for graphical design. We are  
5 grateful to Francesca Bartolini and Marina Mikhaylova for their constructive feedback on the  
6 manuscript as well as to all members of the Nguyen and Weil laboratories for their critical  
7 reading. L.N. is Senior Research Associates from F.R.S- F.N.R.S. This work was supported  
8 by the F.R.S.-F.N.R.S. (Synet; EOS 0019118F-RG36 ), the Fonds Leon Fredericq (L.N.), the  
9 Fondation Médicale Reine Elisabeth (L.N.), the Fondation Simone et Pierre Clerdent (L.N),  
10 the Belgian Science Policy (IAP-VII network P7/20 (L.N.)), and the ERANET Neuron STEM-  
11 MCD and NeuroTalk (L.N.); grants from Agence Nationale de la Recherche (ANR-18-CE16-  
12 0009-01 AXYON (F.S.); ANR-15-IDEX-02 NeuroCoG (F.S.) in the framework of the  
13 “Investissements d’avenir” program); Fondation pour la Recherche Médicale (FRM,  
14 DEI20151234418, F.S.). A.E.’s stay at GIGA Research Institute of the University of Liège was  
15 funded by EMBO Short-Term Fellowships (ASTF 174-2016), A.E., M.S., and M.W.’s research  
16 was supported by the Israel Science Foundation (grant no. 1688/16). The authors declare no  
17 competing financial interests.

18

## 19 **References**

- 20 1. Godena VK, Brookes-Hocking N, Moller A, Shaw G, Oswald M, Sancho RM, et al.  
21 Increasing microtubule acetylation rescues axonal transport and locomotor deficits caused  
22 by LRRK2 Roc-COR domain mutations. *Nat Commun.* 2014;5:5245.
- 23 2. Gauthier LR, Charrin BC, Borrell-Pages M, Dompierre JP, Rangone H, Cordelieres FP,  
24 et al. Huntingtin controls neurotrophic support and survival of neurons by enhancing BDNF  
25 vesicular transport along microtubules. *Cell.* 2004;118(1):127-38.
- 26 3. Mo Z, Zhao X, Liu H, Hu Q, Chen XQ, Pham J, et al. Aberrant GlyRS-HDAC6 interaction  
27 linked to axonal transport deficits in Charcot-Marie-Tooth neuropathy. *Nat Commun.*  
28 2018;9(1):1007.
- 29 4. Wang Q, Tian J, Chen H, Du H, Guo L. Amyloid beta-mediated KIF5A deficiency  
30 disrupts anterograde axonal mitochondrial movement. *Neurobiol Dis.* 2019;127:410-8.

- 1 5. Bento-Abreu A, Jager G, Swinnen B, Rue L, Hendrickx S, Jones A, et al. Elongator  
2 subunit 3 (ELP3) modifies ALS through tRNA modification. *Hum Mol Genet.*  
3 2018;27(7):1276-89.
- 4 6. Solinger JA, Paolinelli R, Kloss H, Scorza FB, Marchesi S, Sauder U, et al. The  
5 *Caenorhabditis elegans* Elongator complex regulates neuronal alpha-tubulin acetylation.  
6 *PLoS Genet.* 2010;6(1):e1000820.
- 7 7. Glatt S, Letoquart J, Faux C, Taylor NM, Seraphin B, Muller CW. The Elongator  
8 subcomplex Elp456 is a hexameric RecA-like ATPase. *Nat Struct Mol Biol.* 2012;19(3):314-20.
- 9 8. Lin TY, Abbassi NEH, Zakrzewski K, Chramiec-Glabik A, Jemiola-Rzeminska M, Rozycki  
10 J, et al. The Elongator subunit Elp3 is a non-canonical tRNA acetyltransferase. *Nat Commun.*  
11 2019;10(1):625.
- 12 9. Paraskevopoulou C, Fairhurst SA, Lowe DJ, Brick P, Onesti S. The Elongator subunit  
13 Elp3 contains a Fe4S4 cluster and binds S-adenosylmethionine. *Mol Microbiol.*  
14 2006;59(3):795-806.
- 15 10. Close P, Hawkes N, Cornez I, Creppe C, Lambert CA, Rogister B, et al. Transcription  
16 impairment and cell migration defects in elongator-depleted cells: implication for familial  
17 dysautonomia. *Mol Cell.* 2006;22(4):521-31.
- 18 11. Petrakis TG, Wittschieben BO, Svejstrup JQ. Molecular architecture, structure-  
19 function relationship, and importance of the Elp3 subunit for the RNA binding of holo-  
20 elongator. *J Biol Chem.* 2004;279(31):32087-92.
- 21 12. Nguyen L, Humbert S, Saudou F, Chariot A. Elongator - an emerging role in  
22 neurological disorders. *Trends Mol Med.* 2010;16(1):1-6.
- 23 13. Dauden MI, Jaciuk M, Weis F, Lin TY, Kleindienst C, Abbassi NEH, et al. Molecular  
24 basis of tRNA recognition by the Elongator complex. *Sci Adv.* 2019;5(7):eaaw2326.
- 25 14. Miskiewicz K, Jose LE, Bento-Abreu A, Fislage M, Taes I, Kasproicz J, et al. ELP3  
26 controls active zone morphology by acetylating the ELKS family member Bruchpilot. *Neuron.*  
27 2011;72(5):776-88.
- 28 15. Singh N, Lorbeck MT, Zervos A, Zimmerman J, Elefant F. The histone  
29 acetyltransferase Elp3 plays in active role in the control of synaptic bouton expansion and  
30 sleep in *Drosophila*. *J Neurochem.* 2010;115(2):493-504.
- 31 16. Hinckelmann MV, Virlogeux A, Niehage C, Poujol C, Choquet D, Hoflack B, et al. Self-  
32 propelling vesicles define glycolysis as the minimal energy machinery for neuronal transport.  
33 *Nat Commun.* 2016;7:13233.
- 34 17. Lefler S, Cohen MA, Kantor G, Cheishvili D, Even A, Birger A, et al. Familial  
35 Dysautonomia (FD) Human Embryonic Stem Cell Derived PNS Neurons Reveal that Synaptic  
36 Vesicular and Neuronal Transport Genes Are Directly or Indirectly Affected by IKBKAP  
37 Downregulation. *PLoS One.* 2015;10(10):e0138807.
- 38 18. Anderson SL, Coli R, Daly IW, Kichula EA, Rork MJ, Volpi SA, et al. Familial  
39 dysautonomia is caused by mutations of the IKAP gene. *Am J Hum Genet.* 2001;68(3):753-8.
- 40 19. Slangen SA, Blumenfeld A, Gill SP, Leyne M, Mull J, Cuajungco MP, et al. Tissue-  
41 specific expression of a splicing mutation in the IKBKAP gene causes familial dysautonomia.  
42 *Am J Hum Genet.* 2001;68(3):598-605.
- 43 20. Cohen JS, Srivastava S, Farwell KD, Lu HM, Zeng W, Lu H, et al. ELP2 is a novel gene  
44 implicated in neurodevelopmental disabilities. *Am J Med Genet A.* 2015;167(6):1391-5.
- 45 21. Addis L, Ahn JW, Dobson R, Dixit A, Ogilvie CM, Pinto D, et al. Microdeletions of ELP4  
46 Are Associated with Language Impairment, Autism Spectrum Disorder, and Mental  
47 Retardation. *Hum Mutat.* 2015;36(9):842-50.

- 1 22. Kojic M, Gaik M, Kiska B, Salerno-Kochan A, Hunt S, Tedoldi A, et al. Elongator  
2 mutation in mice induces neurodegeneration and ataxia-like behavior. *Nat Commun.*  
3 2018;9(1):3195.
- 4 23. Simpson CL, Lemmens R, Miskiewicz K, Broom WJ, Hansen VK, van Vught PW, et al.  
5 Variants of the elongator protein 3 (ELP3) gene are associated with motor neuron  
6 degeneration. *Hum Mol Genet.* 2009;18(3):472-81.
- 7 24. Abashidze A, Gold V, Anavi Y, Greenspan H, Weil M. Involvement of IKAP in  
8 peripheral target innervation and in specific JNK and NGF signaling in developing PNS  
9 neurons. *PLoS One.* 2014;9(11):e113428.
- 10 25. Creppe C, Malinouskaya L, Volvert ML, Gillard M, Close P, Malaise O, et al. Elongator  
11 controls the migration and differentiation of cortical neurons through acetylation of alpha-  
12 tubulin. *Cell.* 2009;136(3):551-64.
- 13 26. George L, Chaverra M, Wolfe L, Thorne J, Close-Davis M, Eibs A, et al. Familial  
14 dysautonomia model reveals Ikbkap deletion causes apoptosis of Pax3+ progenitors and  
15 peripheral neurons. *Proc Natl Acad Sci U S A.* 2013;110(46):18698-703.
- 16 27. Dietrich P, Alli S, Shanmugasundaram R, Dragatsis I. IKAP expression levels modulate  
17 disease severity in a mouse model of familial dysautonomia. *Hum Mol Genet.*  
18 2012;21(23):5078-90.
- 19 28. Naftelberg S, Abramovitch Z, Gluska S, Yannai S, Joshi Y, Donyo M, et al.  
20 Phosphatidylserine Ameliorates Neurodegenerative Symptoms and Enhances Axonal  
21 Transport in a Mouse Model of Familial Dysautonomia. *PLoS Genet.* 2016;12(12):e1006486.
- 22 29. Reed NA, Cai D, Blasius TL, Jih GT, Meyhofer E, Gaertig J, et al. Microtubule  
23 acetylation promotes kinesin-1 binding and transport. *Curr Biol.* 2006;16(21):2166-72.
- 24 30. Even A, Morelli G, Broix L, Scaramuzzino C, Turchetto S, Gladwyn-Ng I, et al. ATAT1-  
25 enriched vesicles promote microtubule acetylation via axonal transport. *Sci Adv.*  
26 2019;5(12):eaax2705.
- 27 31. Akella JS, Wloga D, Kim J, Starostina NG, Lyons-Abbott S, Morrisette NS, et al. MEC-  
28 17 is an alpha-tubulin acetyltransferase. *Nature.* 2010;467(7312):218-22.
- 29 32. Shida T, Cueva JG, Xu Z, Goodman MB, Nachury MV. The major alpha-tubulin K40  
30 acetyltransferase alphaTAT1 promotes rapid ciliogenesis and efficient mechanosensation.  
31 *Proc Natl Acad Sci U S A.* 2010;107(50):21517-22.
- 32 33. Laguesse S, Creppe C, Nedialkova DD, Prevot PP, Borgs L, Huysseune S, et al. A  
33 Dynamic Unfolded Protein Response Contributes to the Control of Cortical Neurogenesis.  
34 *Dev Cell.* 2015;35(5):553-67.
- 35 34. Hebert JM, McConnell SK. Targeting of cre to the Foxg1 (BF-1) locus mediates loxP  
36 recombination in the telencephalon and other developing head structures. *Dev Biol.*  
37 2000;222(2):296-306.
- 38 35. Nedialkova DD, Leidel SA. Optimization of Codon Translation Rates via tRNA  
39 Modifications Maintains Proteome Integrity. *Cell.* 2015;161(7):1606-18.
- 40 36. Lee WC, Yoshihara M, Littleton JT. Cytoplasmic aggregates trap polyglutamine-  
41 containing proteins and block axonal transport in a Drosophila model of Huntington's  
42 disease. *Proc Natl Acad Sci U S A.* 2004;101(9):3224-9.
- 43 37. Morelli G, Even A, Gladwyn-Ng I, Le Bail R, Shilian M, Godin JD, et al. p27(Kip1)  
44 Modulates Axonal Transport by Regulating alpha-Tubulin Acetyltransferase 1 Stability. *Cell*  
45 *Rep.* 2018;23(8):2429-42.
- 46 38. Hubbert C, Guardiola A, Shao R, Kawaguchi Y, Ito A, Nixon A, et al. HDAC6 is a  
47 microtubule-associated deacetylase. *Nature.* 2002;417(6887):455-8.

- 1 39. Kalebic N, Sorrentino S, Perlas E, Bolasco G, Martinez C, Heppenstall PA. alphaTAT1 is  
2 the major alpha-tubulin acetyltransferase in mice. *Nat Commun.* 2013;4:1962.
- 3 40. Icard P, Poulain L, Lincet H. Understanding the central role of citrate in the  
4 metabolism of cancer cells. *Biochim Biophys Acta.* 2012;1825(1):111-6.
- 5 41. Wellen KE, Hatzivassiliou G, Sachdeva UM, Bui TV, Cross JR, Thompson CB. ATP-  
6 citrate lyase links cellular metabolism to histone acetylation. *Science.* 2009;324(5930):1076-  
7 80.
- 8 42. Dietzl G, Chen D, Schnorrer F, Su KC, Barinova Y, Fellner M, et al. A genome-wide  
9 transgenic RNAi library for conditional gene inactivation in *Drosophila*. *Nature.*  
10 2007;448(7150):151-6.
- 11 43. Dong J, Edelmann L, Bajwa AM, Kornreich R, Desnick RJ. Familial dysautonomia:  
12 detection of the IKBKAP IVS20(+6T --> C) and R696P mutations and frequencies among  
13 Ashkenazi Jews. *Am J Med Genet.* 2002;110(3):253-7.
- 14 44. Lin R, Tao R, Gao X, Li T, Zhou X, Guan KL, et al. Acetylation stabilizes ATP-citrate  
15 lyase to promote lipid biosynthesis and tumor growth. *Mol Cell.* 2013;51(4):506-18.
- 16 45. Baldwin KR, Godena VK, Hewitt VL, Whitworth AJ. Axonal transport defects are a  
17 common phenotype in *Drosophila* models of ALS. *Hum Mol Genet.* 2016;25(12):2378-92.
- 18 46. Millecamps S, Julien JP. Axonal transport deficits and neurodegenerative diseases.  
19 *Nat Rev Neurosci.* 2013;14(3):161-76.
- 20 47. Xu Z, Schaedel L, Portran D, Aguilar A, Gaillard J, Marinkovich MP, et al. Microtubules  
21 acquire resistance from mechanical breakage through intraluminal acetylation. *Science.*  
22 2017;356(6335):328-32.
- 23 48. Laguesse S, Creppe C, Nedialkova DD, Prévot P-P, Borgs L, Huysseune S, et al. A  
24 Dynamic Unfolded Protein Response Contributes to the Control of Cortical Neurogenesis.  
25 *Dev Cell.* 2015;35:553-67.
- 26 49. Kim GW, Li L, Gorbani M, You L, Yang XJ. Mice lacking alpha-tubulin acetyltransferase  
27 1 are viable but display alpha-tubulin acetylation deficiency and dentate gyrus distortion. *J*  
28 *Biol Chem.* 2013;288(28):20334-50.
- 29 50. Gluska S, Chein M, Rotem N, Ionescu A, Perlson E. Tracking Quantum-Dot labeled  
30 neurotropic factors transport along primary neuronal axons in compartmental microfluidic  
31 chambers. *Methods in cell biology.* 2016;131:365-87.
- 32 51. Kawauchi T, Chihama K, Nabeshima Y, Hoshino M. Cdk5 phosphorylates and  
33 stabilizes p27kip1 contributing to actin organization and cortical neuronal migration. *Nat*  
34 *Cell Biol.* 2006;8(1):17-26.
- 35 52. Lee JV, Carrer A, Shah S, Snyder NW, Wei S, Venneti S, et al. Akt-dependent  
36 metabolic reprogramming regulates tumor cell histone acetylation. *Cell Metab.*  
37 2014;20(2):306-19.
- 38 53. Morelli G, Avila A, Ravanidis S, Aourz N, Neve RL, Smolders I, et al. Cerebral Cortical  
39 Circuitry Formation Requires Functional Glycine Receptors. *Cereb Cortex.* 2017;27(3):1863-  
40 77.
- 41 54. Shaver SA, Riedl CA, Parkes TL, Sokolowski MB, Hilliker AJ. Isolation of larval  
42 behavioral mutants in *Drosophila melanogaster*. *Journal of neurogenetics.* 2000;14(4):193-  
43 205.
- 44 55. Chambers RP, Call GB, Meyer D, Smith J, Techau JA, Pearman K, et al. Nicotine  
45 increases lifespan and rescues olfactory and motor deficits in a *Drosophila* model of  
46 Parkinson's disease. *Behavioural brain research.* 2013;253:95-102.

- 1 56. Wang S, Wang Z, Zhou L, Shi X, Xu G. Comprehensive Analysis of Short-, Medium-,  
2 and Long-Chain Acyl-Coenzyme A by Online Two-Dimensional Liquid Chromatography/Mass  
3 Spectrometry. *Anal Chem.* 2017;89(23):12902-8.
- 4 57. Avidan O, Brandis A, Rogachev I, Pick U. Enhanced acetyl-CoA production is  
5 associated with increased triglyceride accumulation in the green alga *Chlorella desiccata*. *J*  
6 *Exp Bot.* 2015;66(13):3725-35.
- 7
- 8
- 9
- 10



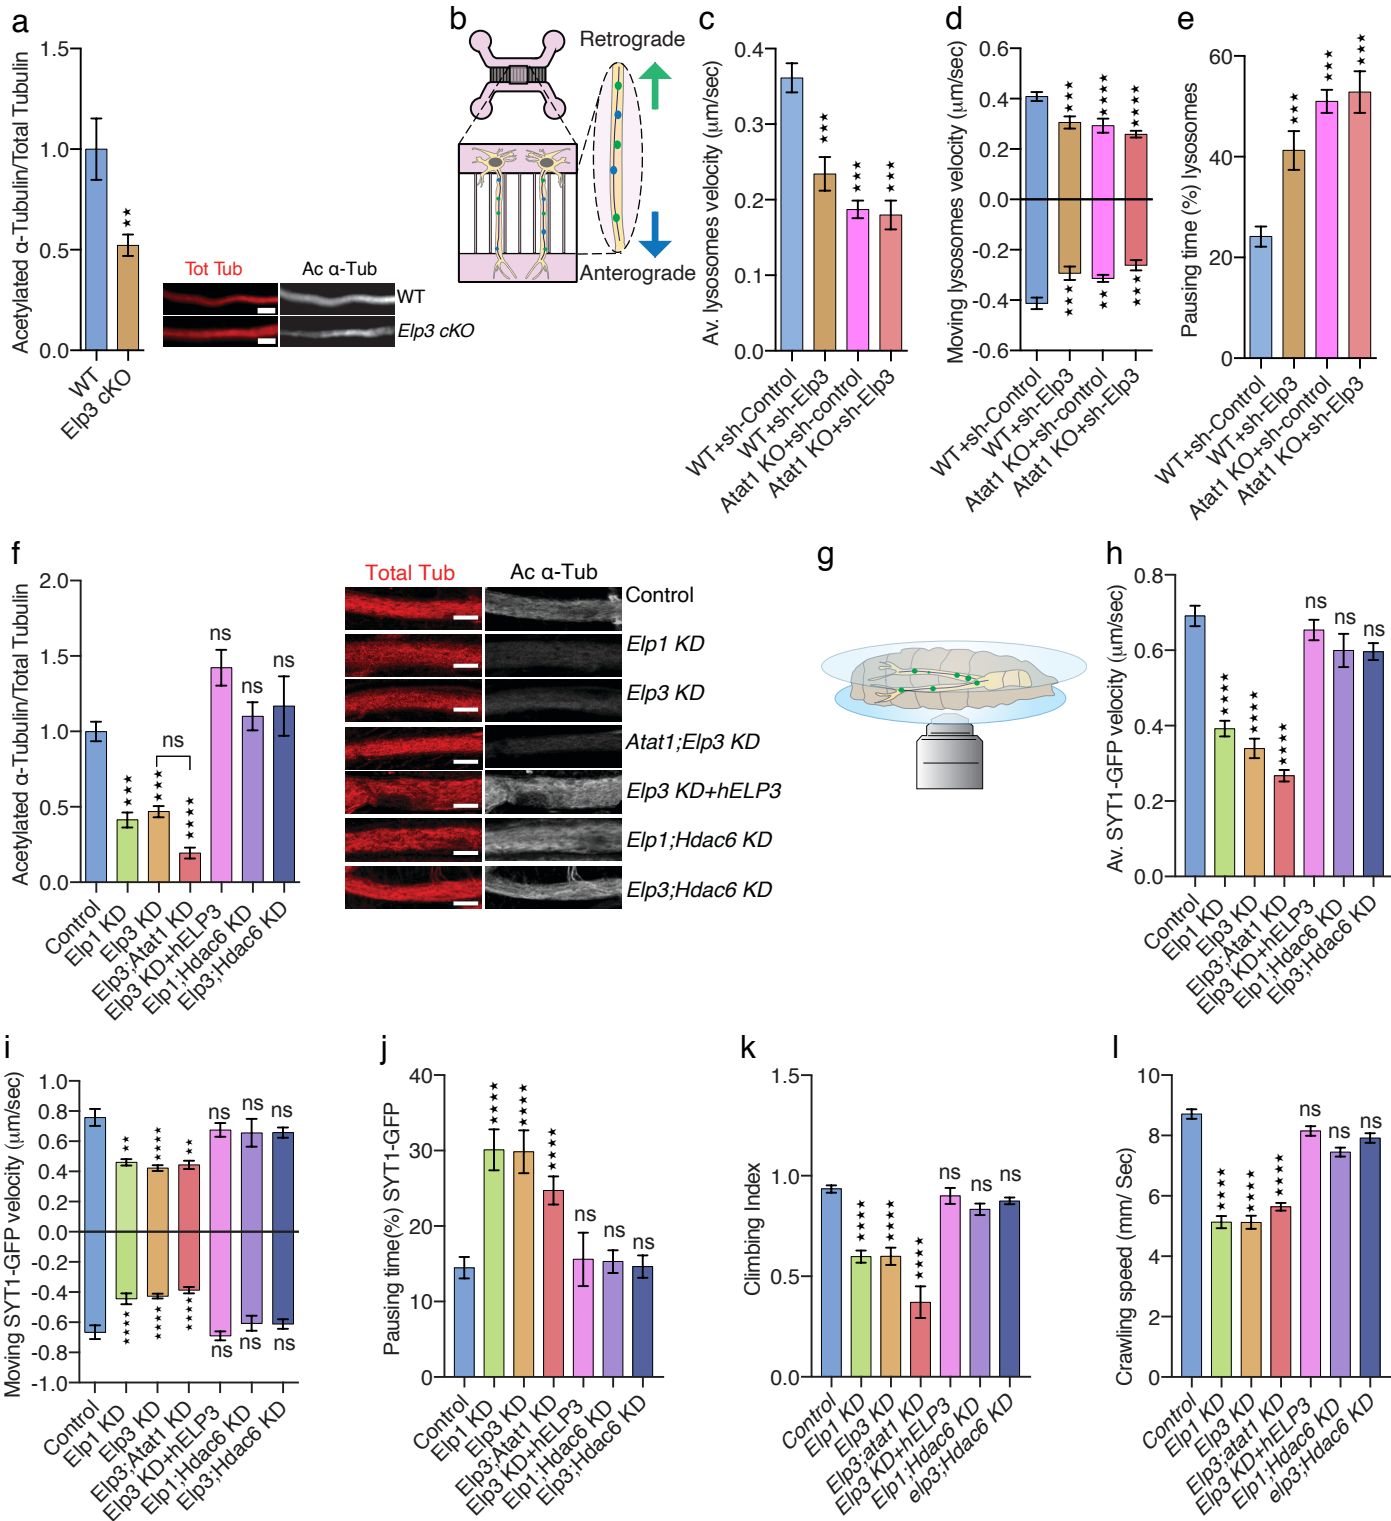

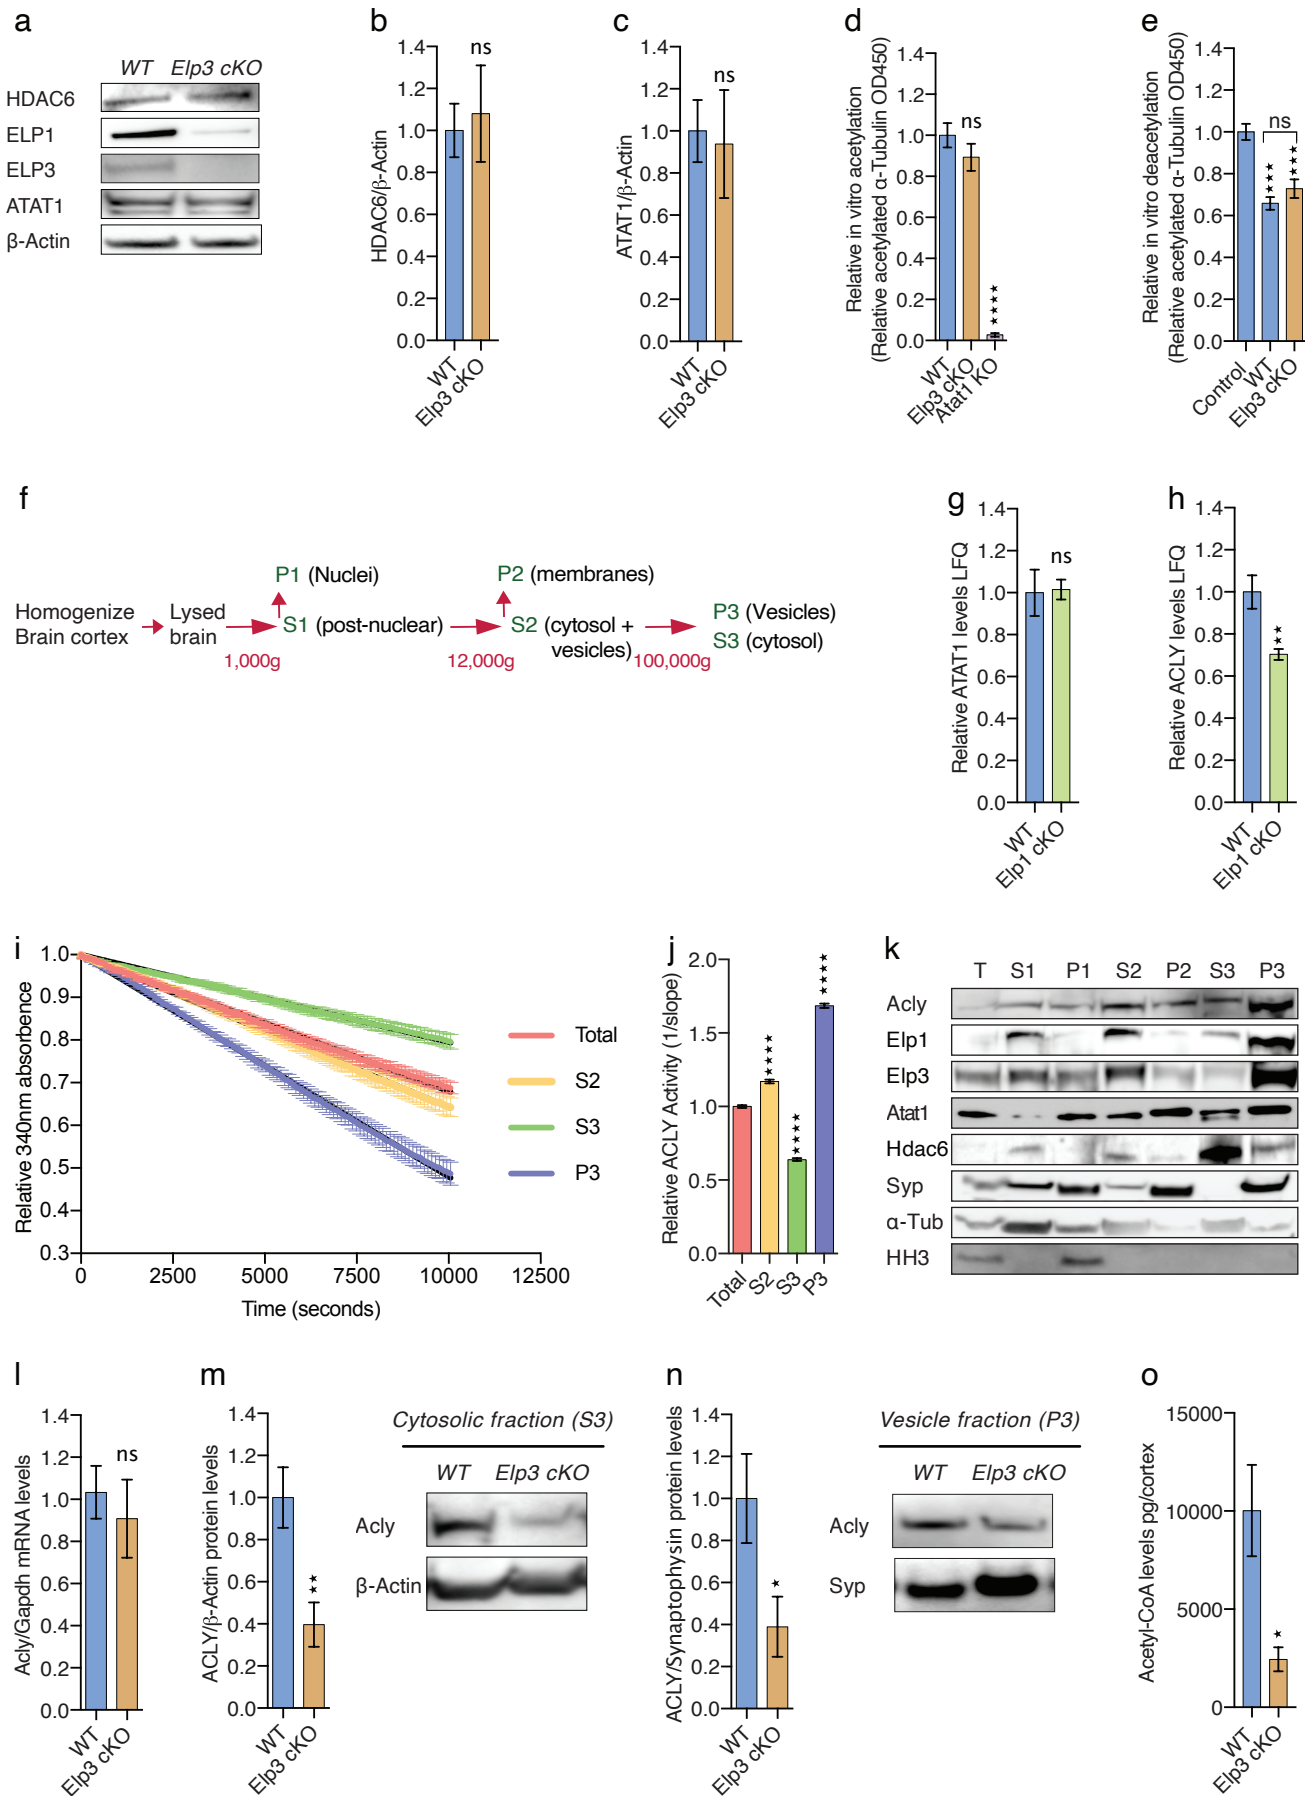

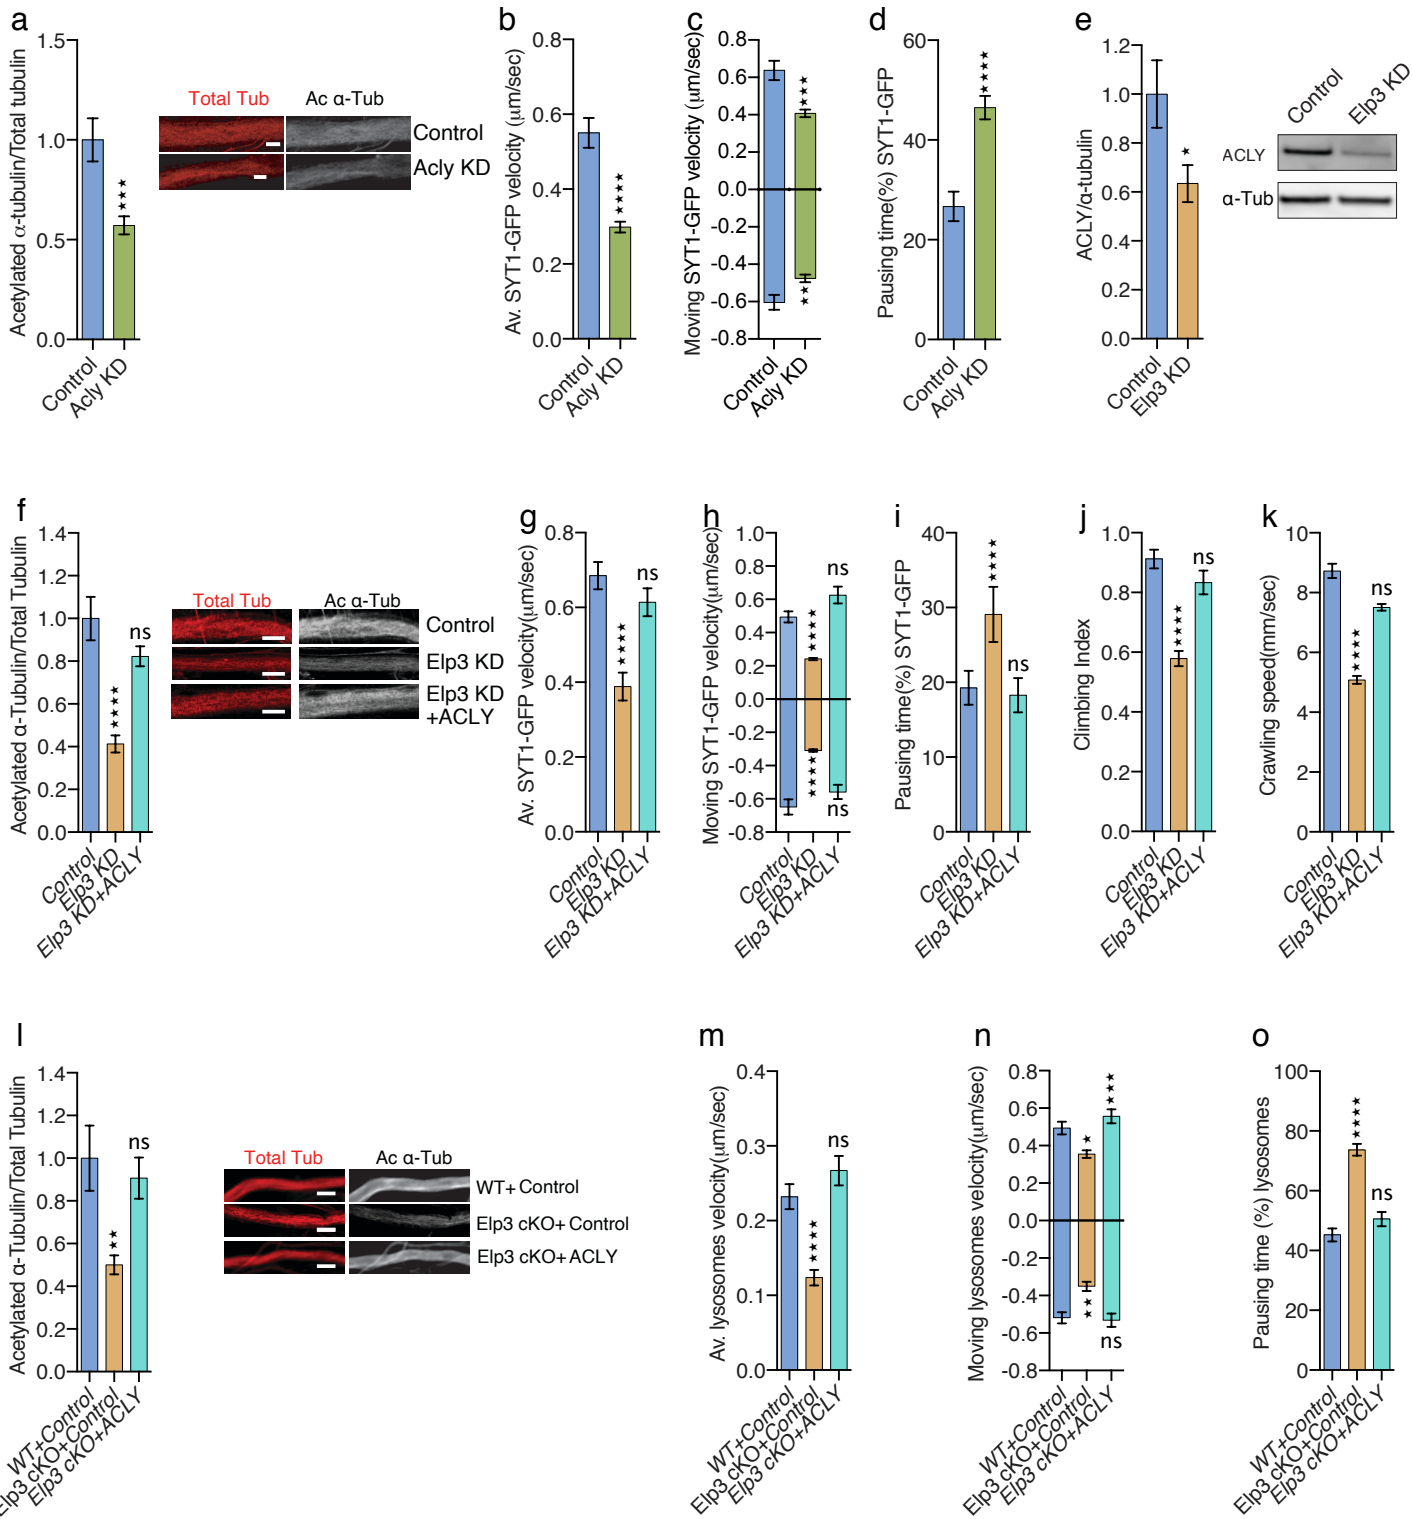

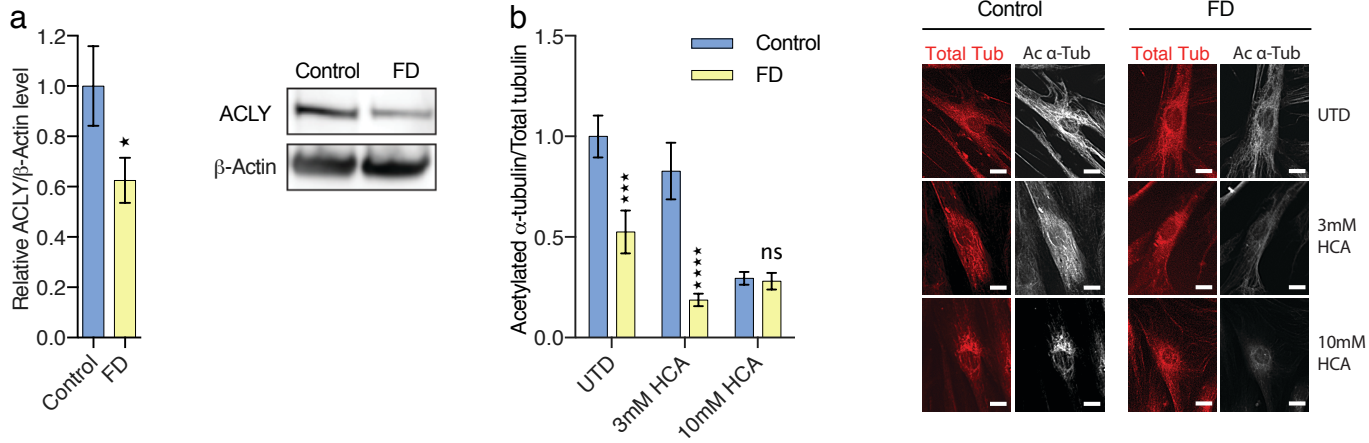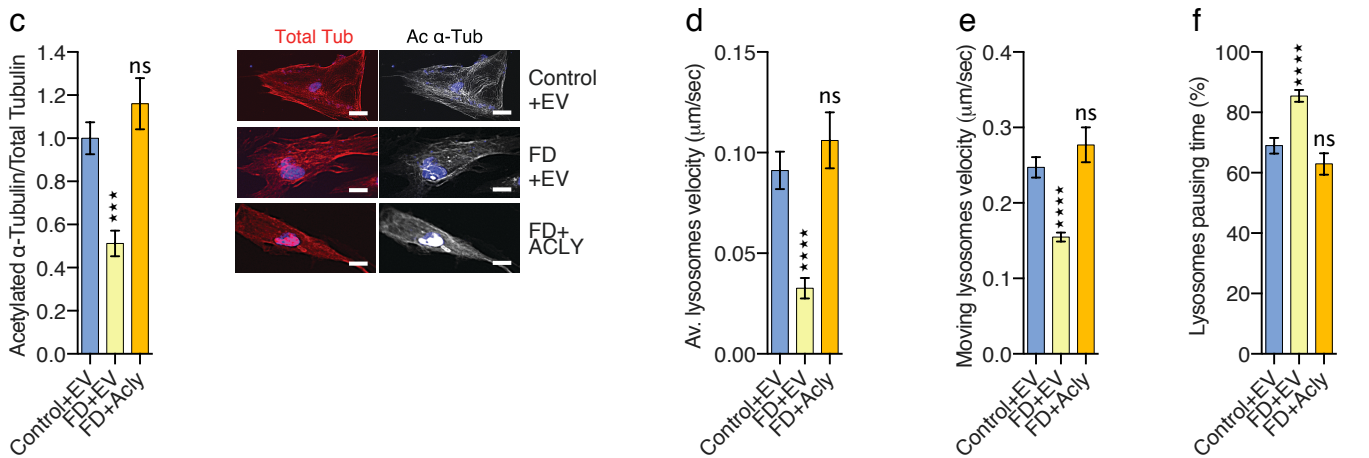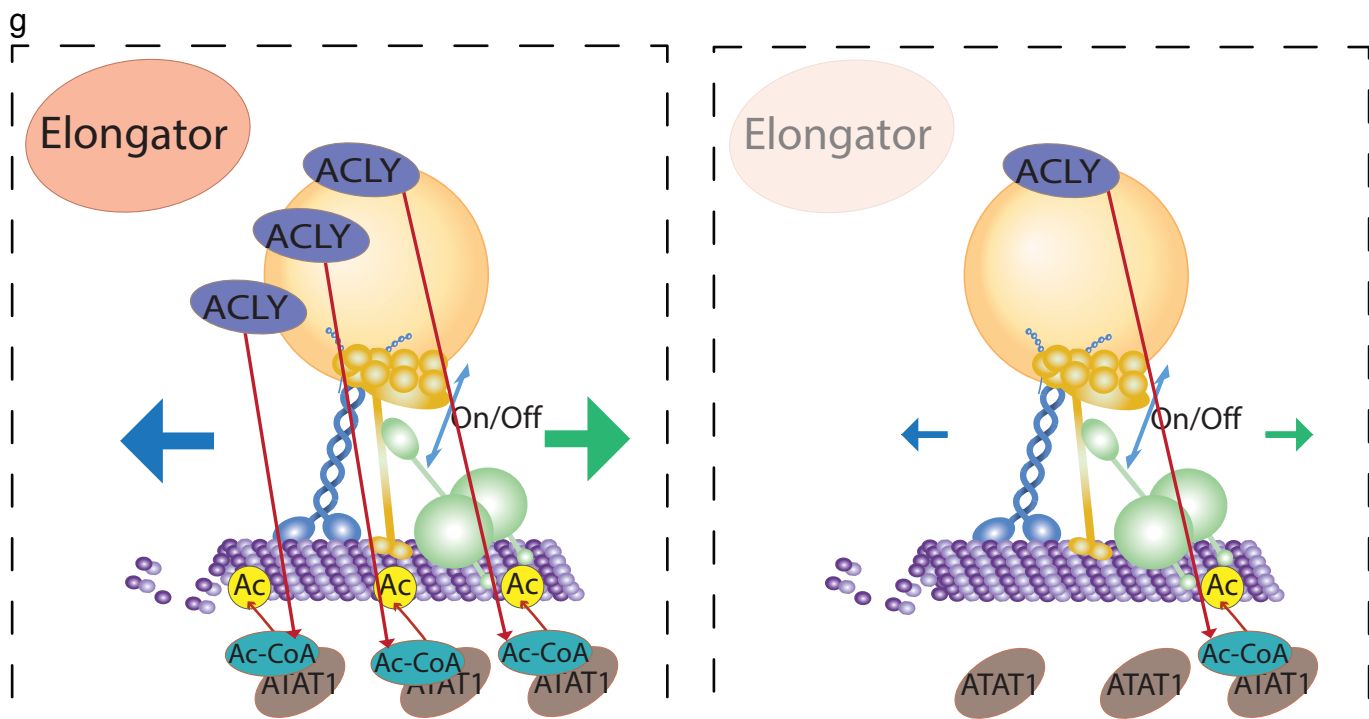

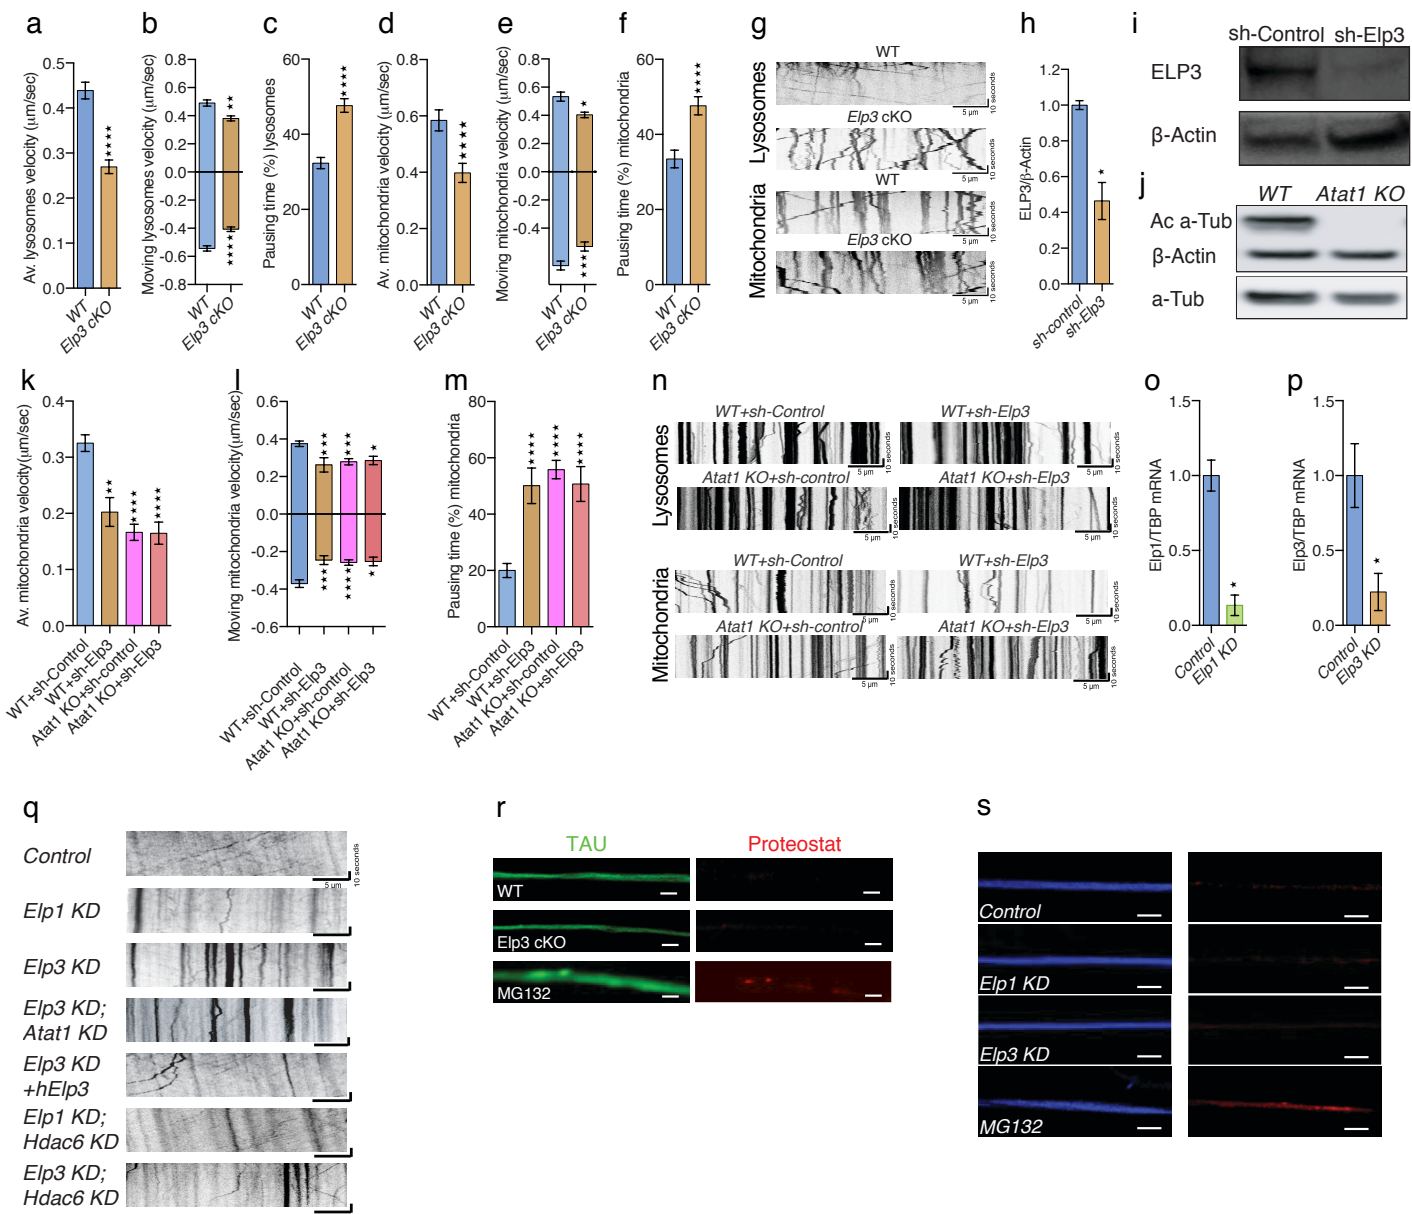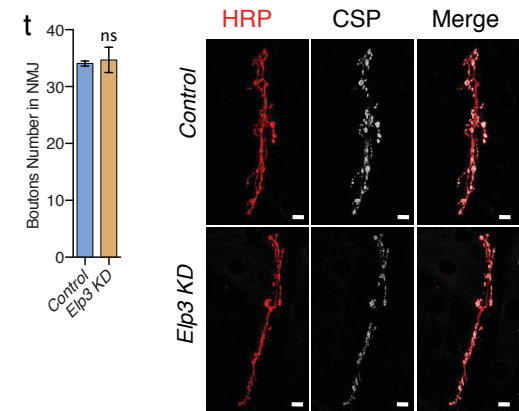

**u**

|      | Amino acid homology compared with Homo sapiens |            |                         |            |
|------|------------------------------------------------|------------|-------------------------|------------|
|      | Mus musculus                                   |            | Drosophila melanogaster |            |
|      | Identity                                       | similarity | Identity                | similarity |
| ELP1 | 80.9                                           | 89.0       | 31.5                    | 50.2       |
| ELP2 | 78.1                                           | 88.3       | 40.4                    | 59.1       |
| ELP3 | 95.8                                           | 98.9       | 81.9                    | 91.5       |
| ELP4 | 77.8                                           | 85.4       | 27.9                    | 45.0       |
| ELP5 | 71.8                                           | 79.4       | 23.2                    | 37.9       |
| ELP6 | 80.1                                           | 88.7       | 19.3                    | 33.6       |

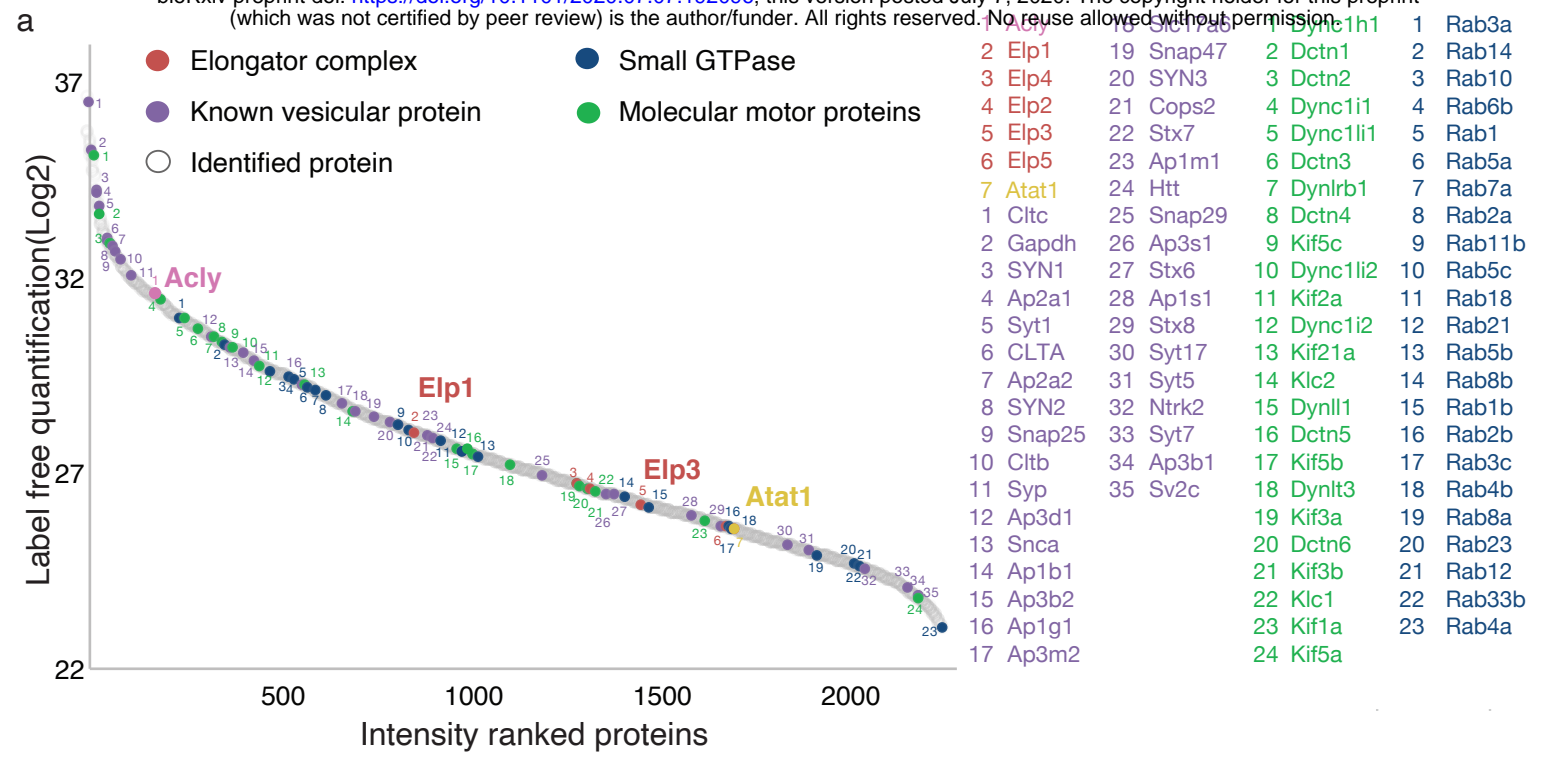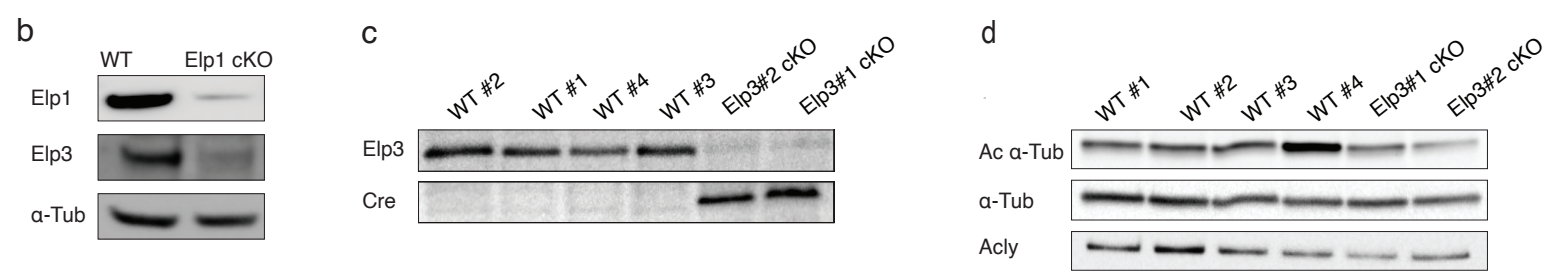

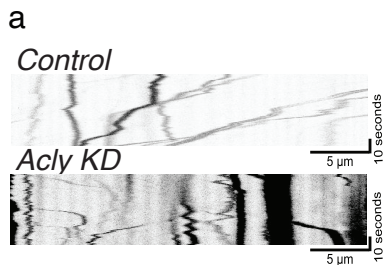

**b**

| Amino acid homology compared with Homo sapiens |              |            |                         |            |
|------------------------------------------------|--------------|------------|-------------------------|------------|
|                                                | Mus musculus |            | Drosophila melanogaster |            |
|                                                | Identity     | similarity | Identity                | similarity |
| ACLY                                           | 97.2         | 98.4       | 68.7                    | 80.8       |

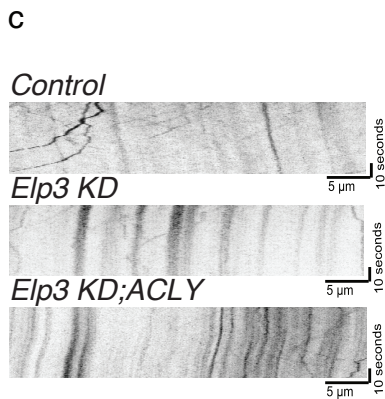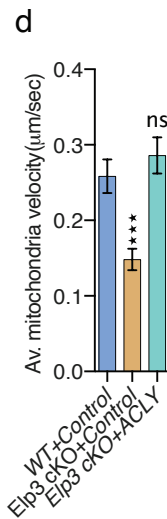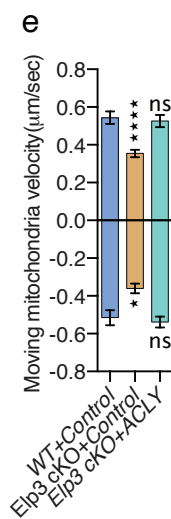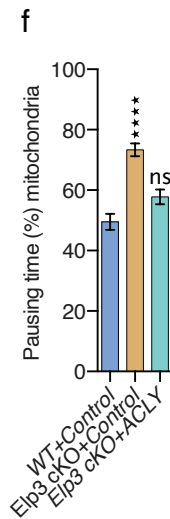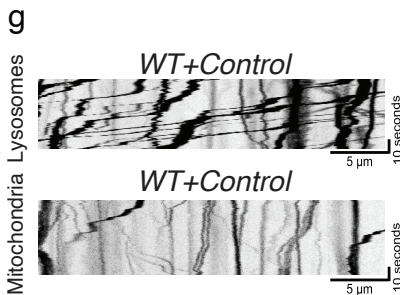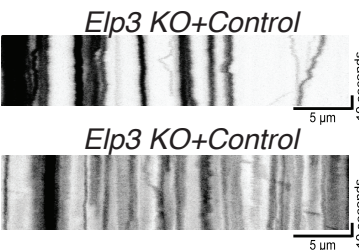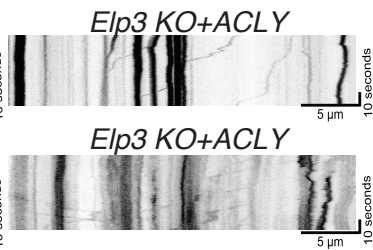

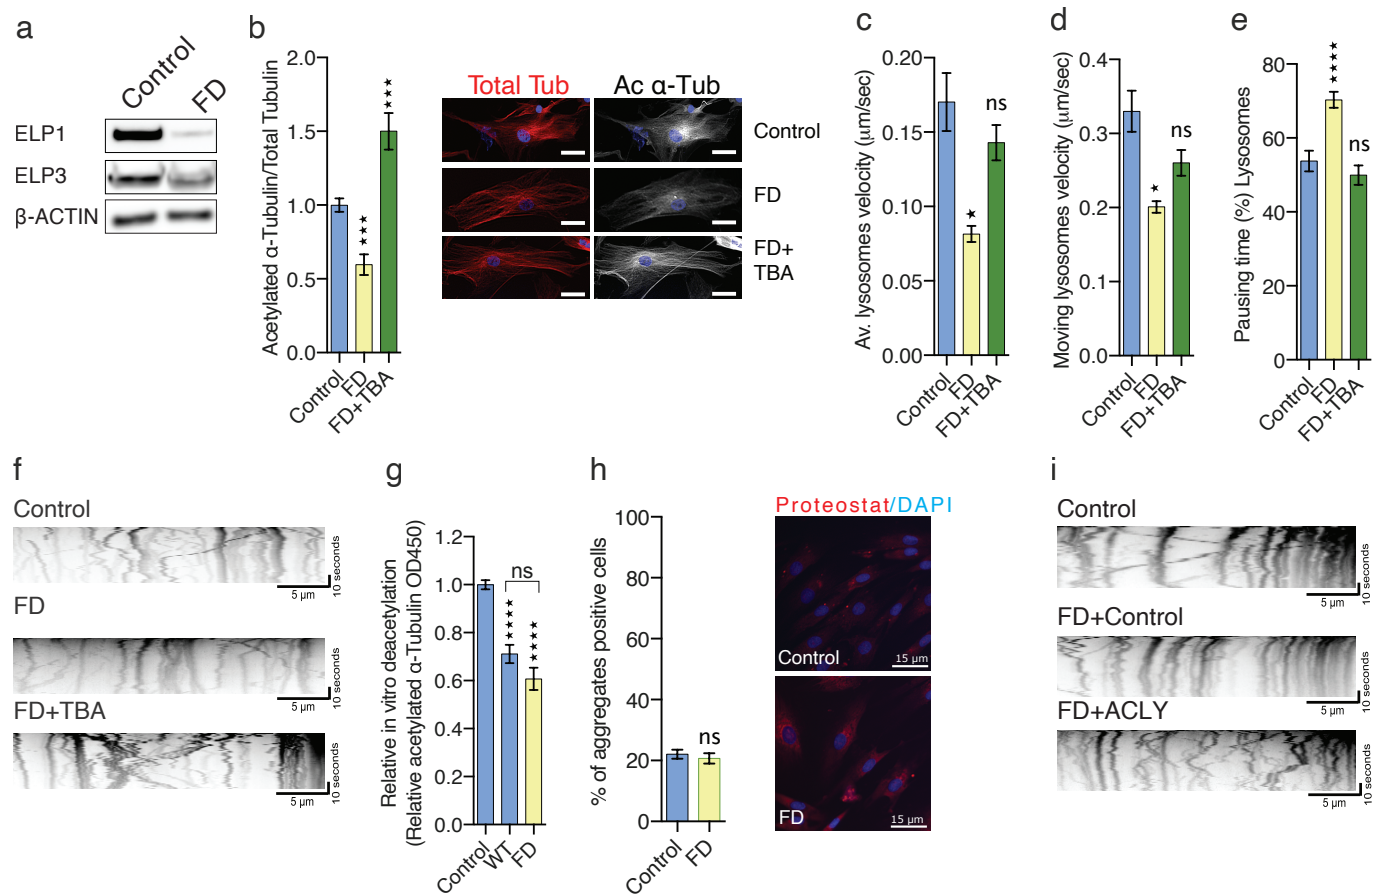

Source: https://www.biorxiv.org/content/10.1101/2020.07.07.192096v1.full.pdf
